# Supplementary material for: Co(iii) complexes of the pentadentate NHC ligand PY4Im: carbene-induced trans influences and the non-disappearing 13C NMR peak
Source: Royal Society of Chemistry journal article supplement (doi:10.1039/d4dt01579g), 2024-01-01

Supplementary material for the manuscript

## Co(III) Complexes of the Pentadentate NHC ligand PY4Im: Carbene-Induced *Trans* Influences and the Non-Disappearing <sup>13</sup>C NMR Peak.

Fouad Ismael, Cassandra L. Fleming, Timothy D. Christopher, Tilo Söhnel, Yuchen Zhou, Elizabeth H. Krenske, Lawrence R. Gahan\* and Allan G. Blackman\*

|                                                                                                                                                              |             |
|--------------------------------------------------------------------------------------------------------------------------------------------------------------|-------------|
| <b>Figure S1:</b> Structure of the [(PY4Im)Co(NCMe)] <sup>3+</sup> cation                                                                                    | Page 2      |
| <b>Figure S2:</b> Structure of the [(PY4Im)Co(N <sub>3</sub> )] <sup>2+</sup> cation                                                                         | Page 3      |
| <b>Figure S3:</b> Structure of the [(PY4Im)Co(NCS)] <sup>2+</sup> cation                                                                                     | Page 4      |
| <b>Figure S4:</b> Structure of the cation [(PY4Im)Co(ONO)] <sup>2+</sup>                                                                                     | Page 5      |
| <b>Table S1.</b> Crystal and refinement data for the [(PY4Im)Co(X)] <sup>n+</sup> complexes                                                                  | Pages 6-7   |
| <b>Table S2:</b> Computational data for [(Py4Im)Co(OH)] <sup>2+</sup>                                                                                        | Page 8      |
| <b>Table S3:</b> Computational data for [(Py4Im)Co(N <sub>3</sub> )] <sup>2+</sup>                                                                           | Page 10     |
| <b>Table S4:</b> Computational data for [(Py4Im)Co(SCN)] <sup>2+</sup>                                                                                       | Page 12     |
| <b>Table S5:</b> Computational data for [(Py4Im)Co(ONO)] <sup>2+</sup>                                                                                       | Page 14     |
| <b>Table S6:</b> Computational data for [(Py4Im)Co(F)] <sup>2+</sup>                                                                                         | Page 16     |
| <b>Table S7:</b> Computational data for [(Py4Im)Co(OH <sub>2</sub> )] <sup>3+</sup>                                                                          | Page 18     |
| <b>Table S8:</b> Computational data for [(Py4Im)Co(CO <sub>3</sub> )] <sup>+</sup>                                                                           | Page 20     |
| <b>Table S9:</b> Computational data for [(Py4Im)Co(N <sub>3</sub> ) <sub>3</sub> ]                                                                           | Page 22     |
| <b>Table S10:</b> Calculated and experimental <sup>13</sup> C chemical shifts for [(Py4Im)Co(F)] <sup>2+</sup>                                               | Page 24     |
| <b>Table S11:</b> Calculated and experimental <sup>13</sup> C chemical shifts for [(Py4Im)Co(OH)] <sup>2+</sup>                                              | Page 24     |
| <b>Table S12:</b> Calculated and experimental <sup>13</sup> C chemical shifts for [(Py4Im)Co(OH <sub>2</sub> )] <sup>3+</sup>                                | Page 24     |
| <b>Table S13:</b> Calculated and experimental <sup>13</sup> C chemical shifts for [(Py4Im)Co(NCS)] <sup>2+</sup>                                             | Page 25     |
| <b>Table S14:</b> Calculated and experimental <sup>13</sup> C chemical shifts for [(Py4Im)Co(N <sub>3</sub> )] <sup>2+</sup>                                 | Page 25     |
| <b>Figure S5:</b> Selected molecular orbitals of [Co(PY4Im)Co(F)] <sup>2+</sup> and [Co(PY4Im)Co(N <sub>3</sub> )] <sup>2+</sup>                             | Pages 26-37 |
| <b>Figure S6:</b> <sup>1</sup> H and <sup>13</sup> C spectra of [Co(PY4Im)(X)] <sup>2+</sup> complexes in D <sub>2</sub> O                                   | Page 38     |
| <b>Figure S7:</b> <sup>1</sup> H and <sup>13</sup> C spectra of [Co(PY4Im)(N <sub>3</sub> ) <sub>3</sub> ] in d <sup>6</sup> -DMSO                           | Page 39     |
| <b>Figure S8:</b> <sup>1</sup> H and <sup>13</sup> C spectra of [Co(PY4Im)(O <sub>2</sub> CO)] <sup>+</sup> in d <sup>7</sup> -DMF                           | Page 40     |
| <b>Figure S9:</b> Residual density plot for [(PY4Im)Co(NCS)](ClO <sub>4</sub> ) <sub>1.5</sub> (NCS) <sub>0.5</sub> ·2H <sub>2</sub> O                       | Page 41     |
| <b>Figure S10:</b> Residual density plot for [(PY4Im)Co(ONO)](ClO <sub>4</sub> ) <sub>2</sub> ·1.5H <sub>2</sub> O                                           | Page 41     |
| <b>Figure S11:</b> Residual density plot for <i>fac</i> -[(PY4Im-κ <sup>3</sup> N,N',C)Co(N <sub>3</sub> ) <sub>3</sub> ].(CH <sub>3</sub> ) <sub>2</sub> SO | Page 42     |

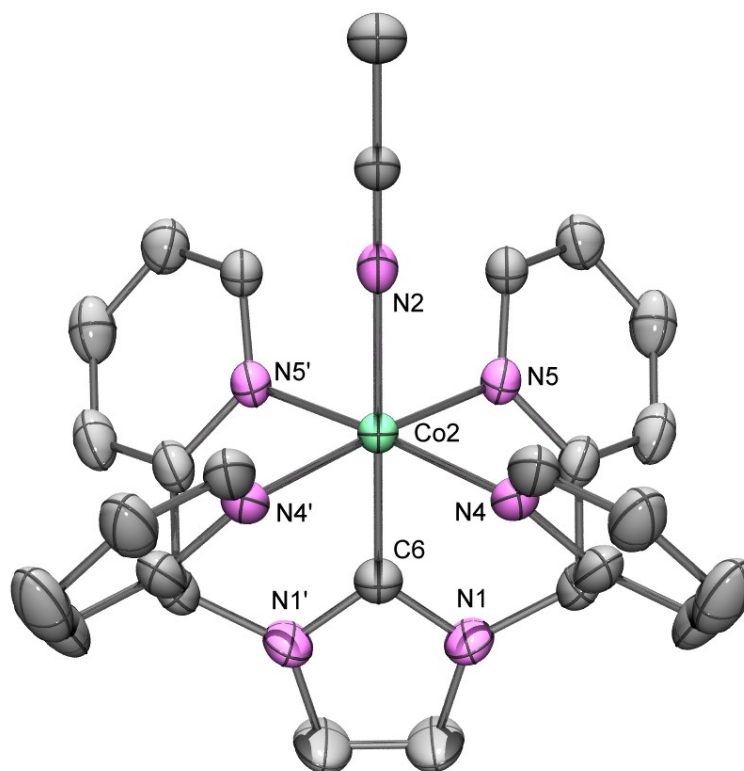

**Figure S1.** Structure of the  $[(\text{PY4Im})\text{Co}(\text{NCMe})]^{3+}$  cation. The C-H hydrogen atoms have been removed for clarity. Bond lengths ( $\text{\AA}$ ) and angles ( $^\circ$ ): Co(2)-N(2) 1.951(3), Co(2)-N(5) 1.991(2), Co(2)-N4 1.999(2), Co(2)-C(6) 1.835(4); N(2)-Co(2)-N(5) 92.45(8), N(2)-Co(2)-N(4) 92.43(8), N(5)-Co(2)-N(5') 95.21(11), N(5)-Co(2)-N(4) 83.84(8), N(5)-Co(2)-N(4') 175.07(9), N(4)-Co(2)-N(4') 96.70(12), C(6)-Co(2)-N(2) 179.74(17), C(6)-Co(2)-N(5) 87.73(11), C(6)-Co(2)-N(4) 87.40(12).

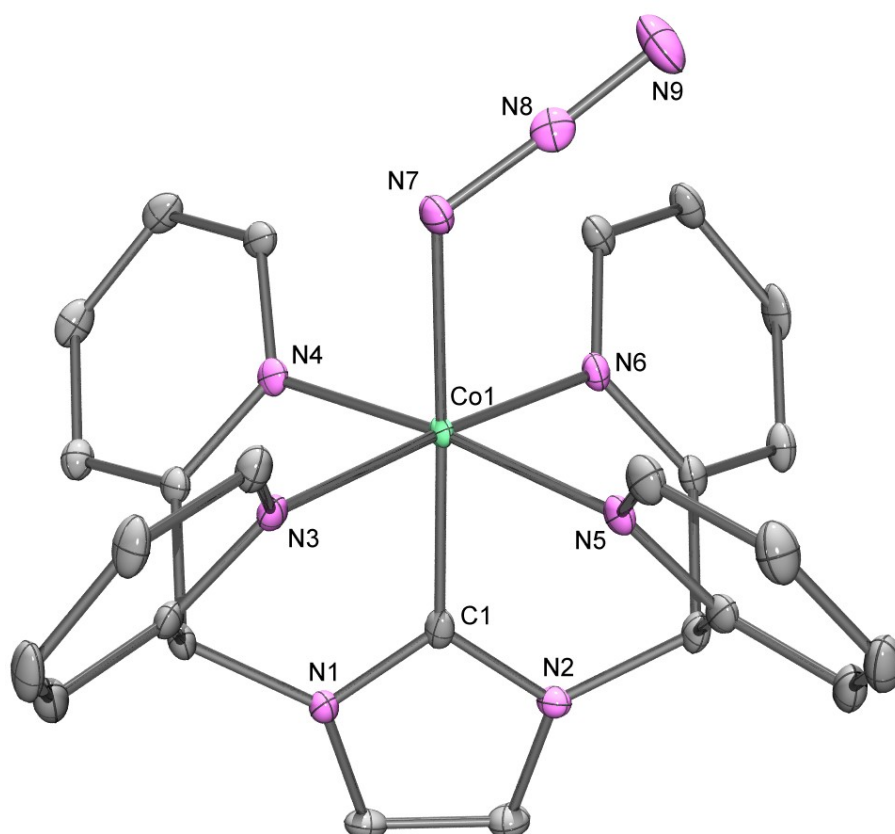

**Figure S2.** Structure of the  $[(\text{PY4Im})\text{Co}(\text{N}_3)]^{2+}$  cation. The C-H hydrogen atoms have been removed for clarity. Bond lengths (Å) and angles ( $^\circ$ ): Co(1)-C(1) 1.862(2), Co(1)-N(7) 1.9708(18), Co(1)-N(3) 1.9812(18), Co(1)-N(5) 1.9899(18), Co(1)-N(6), 1.9968(17), Co(1)-N(4) 2.0164(18), N(8)-N(9) 1.155(3), N(8)-N(7) 1.210(3); C(1)-Co(1)-N(7) 177.68(8), C(1)-Co(1)-N(3) 87.53(8), N(7)-Co(1)-N(3) 90.16(7), C(1)-Co(1)-N(5) 86.44(8), N(7)-Co(1)-N(5) 93.84(8), N(3)-Co(1)-N(5) 96.77(7), C(1)-Co(1)-N(6) 88.05(8), N(7)-Co(1)-N(6) 94.27(7), N(3)-Co(1)-N(6) 175.48(7), N(5)-Co(1)-N(6) 83.89(7), C(1)-Co(1)-N(4) 87.34(8), N(7)-Co(1)-N(4) 92.37(8), N(3)-Co(1)-N(4) 82.70(7), N(5)-Co(1)-N(4) 173.77(7), N(6)-Co(1)-N(4) 96.16(7), N(9)-N(8)-N(7) 177.7(2), N(8)-N(7)-Co(1) 119.48(14).

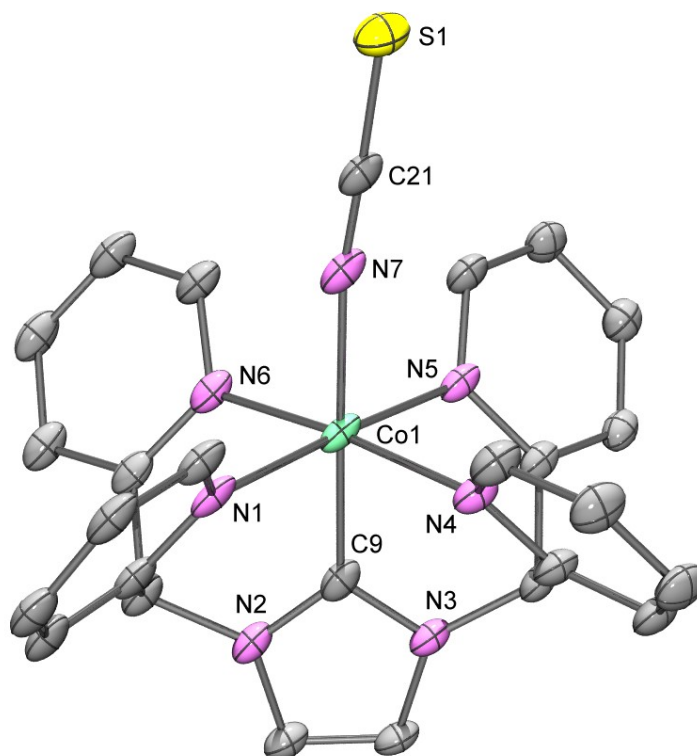

**Figure S3.** Structure of the  $[(\text{PY4Im})\text{Co}(\text{NCS})]^{2+}$  cation. The C-H hydrogen atoms have been removed for clarity. Bond lengths (Å) and angles ( $^{\circ}$ ): Co(1)-N1 1.981(2), Co(1)-N(4) 2.000(2), Co(1)-N(5) 1.994(2), Co(1)-N(6) 1.999(2), Co(1)-N(7) 1.931(2), Co(1)-C(9) 1.841(3); N(1)-Co(1)-N(4) 96.41(9), N(1)-Co(1)-N(5) 176.29(9), N(1)-Co(1)-N(6) 82.60(9), N(5)-Co(1)-N(4) 83.69(9), N(5)-Co(1)-N(6) 96.94(9) N(6)-Co(1)-N(4) 174.40(9), N(7)-Co(1)-N(1) 93.00(10), N(7)-Co(1)-N(4) 91.95(9), N(7)-Co(1)-N(5) 90.70(9), N(7)-Co(1)-N(6) 93.61(9), C(9)-Co(1)-N(1) 88.08(11), C(9)-Co(1)-N(4) 87.51(10), C(9)-Co(1)-N(5) 88.22(11), C(9)-Co(1)-N(6) 86.94(10), C(9)-Co(1)-N(7) 178.84(11) N(7)-C(21)-S(1) 178.1(3), C(21)-N(7)-Co(1) 170.6(2).

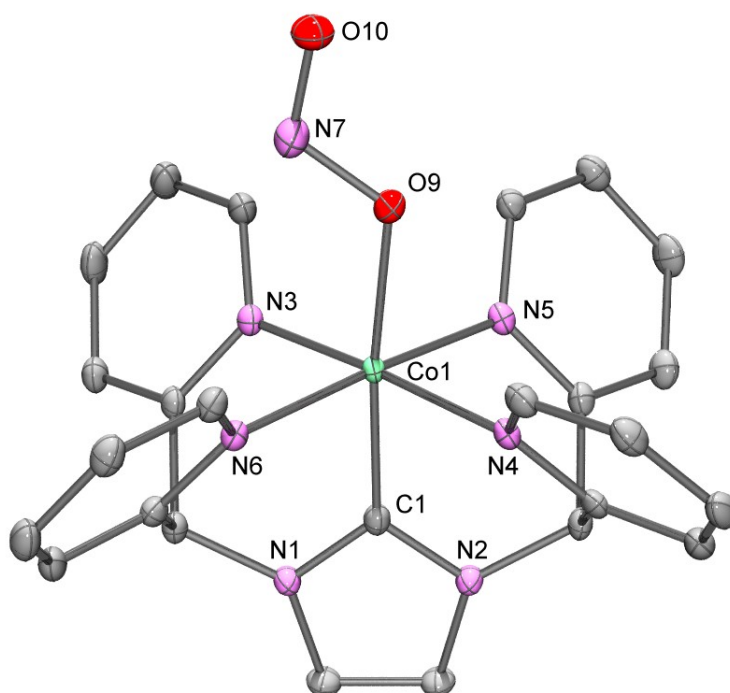

**Figure S4.** Structure of the  $[(\text{PY4Im})\text{Co}(\text{ONO})]^{2+}$  cation. The C-H hydrogen atoms have been removed for clarity. Bond lengths (Å) and angles ( $^{\circ}$ ): Co(1)-C(1) 1.8452(19), Co(1)-O(9) 1.9404(13), Co(1)-N(4) 1.9864(15), Co(1)-N(5) 1.9910(15), Co(1)-N(3) 1.9920(16), Co(1)-N(6) 2.0023(15), O(9)-N(7) 1.314(2), O(10)-N(7) 1.222(2); C(1)-Co(1)-O(9) 173.53(7); C(1)-Co(1)-N(4) 87.28(7), O(9)-Co(1)-N(4) 87.28(6), C(1)-Co(1)-N(5) 87.63(7), O(9)-Co(1)-N(5) 88.26(6), N(4)-Co(1)-N(5) 83.22(6), C(1)-Co(1)-N(3) 88.15(7), O(9)-Co(1)-N(3) 97.23(6), N(4)-Co(1)-N(3) 175.31(6), N(5)-Co(1)-N(3) 95.57(6), C(1)-Co(1)-N(6) 87.67(7), O(9)-Co(1)-N(6) 96.55(6), N(4)-Co(1)-N(6) 98.03(6), N(5)-Co(1)-N(6) 175.07(6), N(3)-Co(1)-N(6) 82.80(6), N(7)-O(9)-Co(1) 119.52(11), O(10)-N(7)-O(9) 113.16(15).

**Table S1.** Crystal and refinement data for the [(PY4Im)Co(X)]<sup>n+</sup> complexes.

|                                     | [(PY4Im)Co(N <sub>3</sub> )](ClO <sub>4</sub> ) <sub>2</sub> ·H <sub>2</sub> O  | [(PY4Im)Co(NCMe)](ClO <sub>4</sub> ) <sub>3</sub> ·MeCN                          | [(PY4Im)Co(OH)](ClO <sub>4</sub> ) <sub>2</sub> ·2.75H <sub>2</sub> O                 | [(PY4Im)Co(NCS)](ClO <sub>4</sub> ) <sub>1.5</sub> (NCS) <sub>0.5</sub> ·2H <sub>2</sub> O                 | [(PY4Im)Co(ONO)](ClO <sub>4</sub> ) <sub>2</sub> ·1.5H <sub>2</sub> O               |
|-------------------------------------|---------------------------------------------------------------------------------|----------------------------------------------------------------------------------|---------------------------------------------------------------------------------------|------------------------------------------------------------------------------------------------------------|-------------------------------------------------------------------------------------|
| Empirical formula                   | C <sub>25</sub> H <sub>22</sub> Cl <sub>2</sub> CoN <sub>9</sub> O <sub>9</sub> | C <sub>29</sub> H <sub>26</sub> Cl <sub>3</sub> CoN <sub>8</sub> O <sub>12</sub> | C <sub>25</sub> H <sub>26.5</sub> Cl <sub>2</sub> CoN <sub>8</sub> O <sub>11.75</sub> | C <sub>26.50</sub> H <sub>24</sub> Cl <sub>1.50</sub> CoN <sub>7.50</sub> O <sub>8</sub> S <sub>1.50</sub> | C <sub>25</sub> H <sub>23</sub> Cl <sub>2</sub> CoN <sub>7</sub> O <sub>11.50</sub> |
| Formula weight                      | 722.34                                                                          | 843.86                                                                           | 728.85                                                                                | 735.73                                                                                                     | 735.33                                                                              |
| Temperature / K                     | 105(1)                                                                          | 105.4(8)                                                                         | 104(1)                                                                                | 104(2)                                                                                                     | 105.5(5)                                                                            |
| Wavelength / Å                      | 1.54184                                                                         | 1.54184                                                                          | 1.54184                                                                               | 1.54184                                                                                                    | 1.54184                                                                             |
| Crystal system                      | Monoclinic                                                                      | Orthorhombic                                                                     | Triclinic                                                                             | Monoclinic                                                                                                 | Triclinic                                                                           |
| Space group                         | C2/c                                                                            | Pnma                                                                             | P-1                                                                                   | C2/c                                                                                                       | P-1                                                                                 |
| a / Å                               | 22.5235(3)                                                                      | 16.1590(3)                                                                       | 9.0704(2)                                                                             | 12.4803(2) Å                                                                                               | 9.0838(2)                                                                           |
| b / Å                               | 12.12400(10)                                                                    | 17.8462(3)                                                                       | 12.1819(3)                                                                            | 24.2535(4) Å                                                                                               | 12.5241(2)                                                                          |
| c / Å                               | 22.4083(3)                                                                      | 13.1978(2)                                                                       | 14.3572(3)                                                                            | 19.8778(3)                                                                                                 | 13.9453(2)                                                                          |
| α / °                               | 90                                                                              | 90                                                                               | 99.034(2)                                                                             | 90                                                                                                         | 97.658(2)                                                                           |
| β / °                               | 116.387(2)                                                                      | 90                                                                               | 105.917(2)                                                                            | 104.524(2)                                                                                                 | 108.587(2)                                                                          |
| γ / °                               | 90                                                                              | 90                                                                               | 107.125(2)                                                                            | 90                                                                                                         | 107.640(2)                                                                          |
| Volume / Å <sup>3</sup>             | 5481.60(14)                                                                     | 3805.94(11)                                                                      | 1408.29(6)                                                                            | 5824.55(17)                                                                                                | 1385.87(5)                                                                          |
| Z                                   | 8                                                                               | 4                                                                                | 2                                                                                     | 8                                                                                                          | 2                                                                                   |
| Density (calc) / Mg m <sup>-3</sup> | 1.751                                                                           | 1.473                                                                            | 1.719                                                                                 | 1.678                                                                                                      | 1.762                                                                               |
| Absorp coeff / mm <sup>-1</sup>     | 7.361                                                                           | 6.072                                                                            | 7.208                                                                                 | 7.464                                                                                                      | 7.338                                                                               |
| F(000)                              | 2944                                                                            | 1720                                                                             | 747                                                                                   | 3008                                                                                                       | 750                                                                                 |
| Crystal size / mm <sup>3</sup>      | 0.5 x 0.4 x 0.3                                                                 | 0.14 x 0.12 x 0.12                                                               | 0.1 x 0.1 x 0.05                                                                      | 0.18 x 0.15 x 0.12                                                                                         | 0.15 x 0.05 x 0.04                                                                  |
| Theta range                         | 4.254 to 72.371°                                                                | 4.166 to 72.452°                                                                 | 3.931 to 72.390°                                                                      | 3.645 to 67.725°                                                                                           | 3.458 to 72.468°                                                                    |
| Index ranges                        | -17<=h<=27<br>-14<=k<=14<br>-27<=l<=26                                          | -19<=h<=19<br>-22<=k<=21<br>-11<=l<=16                                           | -11<=h<=8<br>-15<=k<=14<br>-17<=l<=17                                                 | -14<=h<=11<br>-29<=k<=26<br>-21<=l<=23                                                                     | -11<=h<=10<br>-15<=k<=13<br>-15<=l<=17                                              |
| Reflections collected               | 20952                                                                           | 17639                                                                            | 17589                                                                                 | 24073                                                                                                      | 18024                                                                               |
| Independent reflections             | 5213 [R(int) = 0.0359]                                                          | 3806 [R(int) = 0.0343]                                                           | 5283 [R(int) = 0.0519]                                                                | 5279 [R(int) = 0.0417]                                                                                     | 5271 [R(int) = 0.0282]                                                              |
| Completeness to θ = 67.684° / %     | 99.3                                                                            | 99.9                                                                             | 98.1                                                                                  | 99.8                                                                                                       | 99.8                                                                                |
| Absorption correction               | Semi-empirical from equivalents                                                 | Semi-empirical from equivalents                                                  | Semi-empirical from equivalents                                                       | Semi-empirical from equivalents                                                                            | Semi-empirical from equivalents                                                     |
| Max and min transmission            | 1.00000 and 0.35920                                                             | 1.00000 and 0.78181                                                              | 1.00000 and 0.49502                                                                   | 1.00000 and 0.65298                                                                                        | 1.00000 and 0.80828                                                                 |
| Refinement method                   | Full-matrix least-squares on F <sup>2</sup>                                     | Full-matrix least-squares on F <sup>2</sup>                                      | Full-matrix least-squares on F <sup>2</sup>                                           | Full-matrix least-squares on F <sup>2</sup>                                                                | Full-matrix least-squares on F <sup>2</sup>                                         |
| Data/restraints/parameters          | 5213 / 0 / 424                                                                  | 3806 / 0 / 248                                                                   | 5283 / 29 / 443                                                                       | 5279 / 81 / 439                                                                                            | 5271 / 0 / 435                                                                      |
| Goodness of fit on F <sup>2</sup>   | 1.067                                                                           | 1.070                                                                            | 1.097                                                                                 | 1.071                                                                                                      | 1.040                                                                               |
| Final R indices [I>2σ(I)]           | R1 = 0.0375, wR2 = 0.1040                                                       | R1 = 0.0419, wR2 = 0.1161                                                        | R1 = 0.0474, wR2 = 0.1247                                                             | R1 = 0.0414, wR2 = 0.1047                                                                                  | R1 = 0.0289, wR2 = 0.0725                                                           |
| R indices (all data)                | R1 = 0.0382, wR2 = 0.1046                                                       | R1 = 0.0497, wR2 = 0.1214                                                        | R1 = 0.0520, wR2 = 0.1271                                                             | R1 = 0.0429, wR2 = 0.1058                                                                                  | R1 = 0.0300, wR2 = 0.0731                                                           |
| Extinction coefficient              | 0.00024(3)                                                                      | n/a                                                                              | n/a                                                                                   | n/a                                                                                                        | n/a                                                                                 |
| Largest diff. peak and hole         | 0.623 and -0.750 e.Å <sup>-3</sup>                                              | 0.281 and -0.377 e.Å <sup>-3</sup>                                               | 1.041 and -0.937 e.Å <sup>-3</sup>                                                    | 0.720 and -0.607 e.Å <sup>-3</sup>                                                                         | 0.456 and -0.403 e.Å <sup>-3</sup>                                                  |

| Complex cation                      | [(PY4Im)Co(F)](ClO <sub>4</sub> ) <sub>2</sub> .1.5H <sub>2</sub> O                 | [(PY4Im)Co(O <sub>2</sub> CO)](ClO <sub>4</sub> ).2H <sub>2</sub> O | [(PY4Im)Co(N <sub>3</sub> ) <sub>3</sub> ].DMSO      |
|-------------------------------------|-------------------------------------------------------------------------------------|---------------------------------------------------------------------|------------------------------------------------------|
| Empirical formula                   | C <sub>25</sub> H <sub>23</sub> Cl <sub>2</sub> CoFN <sub>6</sub> O <sub>9.50</sub> | C <sub>26</sub> H <sub>24</sub> ClCoN <sub>6</sub> O <sub>9</sub>   | C <sub>27</sub> H <sub>27</sub> CoN <sub>15</sub> OS |
| Formula weight                      | 708.32                                                                              | 658.89                                                              | 668.62                                               |
| Temperature / K                     | 120(1)                                                                              | 104.5(9)                                                            | 120.0(4)                                             |
| Wavelength / Å                      | 1.54184                                                                             | 1.54184                                                             | 1.54184                                              |
| Crystal system                      | Triclinic                                                                           | Triclinic                                                           | Triclinic                                            |
| Space group                         | P-1                                                                                 | P-1                                                                 | P-1                                                  |
| a / Å                               | 12.7950(2)                                                                          | 9.26770(10)                                                         | 13.4885(5)                                           |
| b / Å                               | 14.1951(2)                                                                          | 12.22350(10)                                                        | 15.3951(5)                                           |
| c / Å                               | 16.8217(2)                                                                          | 12.65450(10)                                                        | 16.3964(4)                                           |
| α / °                               | 105.4160(12)                                                                        | 98.3430(10)                                                         | 89.394(2)                                            |
| β / °                               | 98.6806(12)                                                                         | 110.8070(10)                                                        | 66.838(3)                                            |
| γ / °                               | 107.2355(14)                                                                        | 92.9920(10)                                                         | 71.033(3)                                            |
| Volume / Å <sup>3</sup>             | 2724.15(7)                                                                          | 1317.51(2)                                                          | 2933.38(18)                                          |
| Z                                   | 4                                                                                   | 2                                                                   | 4                                                    |
| Density (calc) / Mg m <sup>-3</sup> | 1.727                                                                               | 1.661                                                               | 1.514                                                |
| Absorp coeff / mm <sup>-1</sup>     | 7.425                                                                               | 6.644                                                               | 5.688                                                |
| F(000)                              | 1444                                                                                | 676                                                                 | 1380                                                 |
| Crystal size / mm <sub>3</sub>      | 0.25 x 0.15 x 0.10                                                                  | 0.16 x 0.080 x 0.080                                                | 0.15 x 0.04 x 0.04                                   |
| Theta range                         | 2.814 to 72.449°                                                                    | 3.678 to 72.479°                                                    | 2.958 to 72.959°                                     |
| Index ranges                        | -15<=h<=15<br>-17<=k<=17<br>-20<=l<=20                                              | -11<=h<=11<br>-15<=k<=14<br>-15<=l<=15                              | -15<=h<=16<br>-16<=k<=19<br>-20<=l<=20               |
| Reflections collected               | 86489                                                                               | 16035                                                               | 40399                                                |
| Independent reflections             | 10434 [R(int) = 0.0354]                                                             | 4733 [R(int) = 0.0287]                                              | 11274 [R(int) = 0.0756]                              |
| Completeness to θ = 67.684° / %     | 99.9                                                                                | 99.4                                                                | 99.8                                                 |
| Absorption correction               | Semi-empirical from equivalents                                                     | Semi-empirical from equivalents                                     | Semi-empirical from equivalents                      |
| Max and min transmission            | 1.00000 and 0.65891                                                                 | 1.00000 and 0.78951                                                 | 1.00000 and 0.74245                                  |
| Refinement method                   | Full-matrix least-squares on F <sup>2</sup>                                         | Full-matrix least-squares on F <sup>2</sup>                         | Full-matrix least-squares on F <sup>2</sup>          |
| Data/restraints/parameters          | 10434 / 42 / 840                                                                    | 4733 / 0 / 405                                                      | 11274 / 74 / 819                                     |
| Goodness of fit on F <sup>2</sup>   | 1.033                                                                               | 1.061                                                               | 1.093                                                |
| Final R indices [I>2σ(I)]           | R1 = 0.0342, wR2 = 0.0869                                                           | R1 = 0.0262, wR2 = 0.0685                                           | R1 = 0.0734, wR2 = 0.1925                            |
| R indices (all data)                | R1 = 0.0355, wR2 = 0.0876                                                           | R1 = 0.0274, wR2 = 0.0689                                           | R1 = 0.0909, wR2 = 0.2049                            |
| Extinction coefficient              | 0.00022(4)                                                                          | 0.00059(14)                                                         | 0.00056(15)                                          |
| Largest diff. peak and hole         | 1.096 and -0.690 e.Å <sup>-3</sup>                                                  | 0.306 and -0.329 e.Å <sup>-3</sup>                                  | 2.423 and -1.023 e.Å <sup>-3</sup>                   |





## Computational Data

The Cartesian coordinates of the optimized structures are listed below, along with their computed energies. Geometries listed below were computed with M06 functionals using Gaussian 16. Underneath each set of coordinates are reported the number of imaginary frequencies, the electronic potential energy (E) and the Gibbs free energy at 298.15 K and 1 mol/L (G). All energies are given in Hartree.

**Table S2: [(Py4Im)Co(OH)]<sup>2+</sup>**

Imaginary frequencies 0

E -1513.246168

G 298.15 K, 1 atm -1512.87334

|    |           |           |           |
|----|-----------|-----------|-----------|
| H  | 0.835848  | -0.000132 | -2.770265 |
| Co | -0.000485 | 0.000014  | -0.551880 |
| N  | 1.489523  | 1.329295  | -0.478917 |
| O  | -0.070013 | -0.000164 | -2.447297 |
| N  | 1.105699  | -0.000356 | 2.081435  |
| N  | -1.503498 | 1.303697  | -0.456823 |
| C  | 0.025271  | 0.000318  | 1.320356  |
| N  | 1.489374  | -1.329482 | -0.478864 |
| N  | -1.028406 | 0.000061  | 2.116758  |
| N  | -1.503655 | -1.303589 | -0.456764 |
| C  | -1.667421 | -2.241762 | -1.391496 |
| H  | -0.984327 | -2.204954 | -2.229170 |
| C  | 1.591792  | -2.323810 | -1.365753 |
| H  | 0.856868  | -2.350970 | -2.157944 |
| C  | -0.617232 | -0.000797 | 3.444652  |
| H  | -1.315109 | -0.000936 | 4.266504  |
| C  | -3.585899 | 3.118521  | -0.284414 |
| H  | -4.394382 | 3.836886  | -0.206054 |
| C  | -2.413659 | 1.208759  | 0.534413  |
| C  | -2.688896 | 3.173219  | -1.334053 |
| H  | -2.772684 | 3.916776  | -2.117158 |
| C  | -2.689211 | -3.173047 | -1.333938 |
| H  | -2.773074 | -3.916576 | -2.117063 |
| C  | 2.442215  | 1.213941  | 0.469584  |
| C  | 3.482870  | -2.113804 | 0.575814  |
| H  | 4.223158  | -1.976346 | 1.355550  |
| C  | -2.413775 | -1.208635 | 0.534507  |
| C  | -2.316947 | 0.000089  | 1.438994  |
| H  | -3.123669 | 0.000186  | 2.173538  |
| C  | 3.559408  | 3.168617  | -0.320635 |
| H  | 4.364188  | 3.891850  | -0.249925 |
| C  | 2.442430  | -1.213898 | 0.469235  |
| C  | -3.456496 | -2.103722 | 0.653337  |

|   |           |           |           |
|---|-----------|-----------|-----------|
| H | -4.163291 | -1.988994 | 1.467113  |
| C | -1.667151 | 2.241884  | -1.391562 |
| H | -0.984010 | 2.205028  | -2.229194 |
| C | 1.591994  | 2.323693  | -1.365734 |
| H | 0.857499  | 2.350461  | -2.158342 |
| C | -3.456358 | 2.103892  | 0.653164  |
| H | -4.163221 | 1.989191  | 1.466883  |
| C | 2.603982  | 3.265072  | -1.314146 |
| H | 2.632599  | 4.051434  | -2.058387 |
| C | 2.604240  | -3.264739 | -1.314806 |
| H | 2.632739  | -4.051061 | -2.059095 |
| C | 3.560216  | -3.167880 | -0.321873 |
| H | 4.365465  | -3.890646 | -0.251746 |
| C | 2.374817  | -0.000121 | 1.365816  |
| H | 3.201027  | -0.000160 | 2.077975  |
| C | -3.586142 | -3.118339 | -0.284242 |
| H | -4.394656 | -3.836664 | -0.205839 |
| C | 3.482156  | 2.114350  | 0.576833  |
| H | 4.222133  | 1.977105  | 1.356904  |
| C | 0.738416  | -0.001150 | 3.422073  |
| H | 1.463154  | -0.001820 | 4.220336  |

**Table S3: [(Py4Im)Co(N<sub>3</sub>)]<sup>2+</sup>**

Imaginary frequencies 0

E -1601.587679

G 298.15 K, 1 atm -1601.218281

|    |           |           |           |
|----|-----------|-----------|-----------|
| Co | -0.035835 | -0.000352 | -0.396443 |
| N  | 1.438363  | -1.340788 | -0.177370 |
| N  | -1.545501 | -1.315734 | -0.436107 |
| N  | 1.151919  | -0.002448 | -2.902917 |
| N  | -1.309297 | 0.000783  | 2.154272  |
| N  | -1.545919 | 1.314700  | -0.437247 |
| N  | 0.077937  | -0.000114 | -2.371755 |
| N  | 0.819548  | 0.001119  | 2.317768  |
| N  | 1.437796  | 1.341032  | -0.178865 |
| C  | 1.621108  | -2.353658 | -1.032526 |
| H  | 0.956739  | -2.417900 | -1.882209 |
| C  | 1.620415  | 2.352638  | -1.035538 |
| H  | 0.956389  | 2.415001  | -1.885655 |
| C  | 0.328511  | 0.002707  | 3.617649  |
| H  | 0.977676  | 0.003591  | 4.478408  |
| C  | -1.623432 | -2.272380 | -1.365029 |
| H  | -0.866735 | -2.271444 | -2.136960 |
| C  | -2.648136 | -3.200769 | -1.392649 |
| H  | -2.654915 | -3.956546 | -2.168383 |
| C  | -3.644545 | -3.127509 | -0.438722 |
| H  | -4.459969 | -3.842177 | -0.428910 |
| C  | 2.304688  | -1.213177 | 0.850122  |
| C  | -2.547493 | -1.209887 | 0.462256  |
| C  | 2.303905  | 1.215185  | 0.848982  |
| N  | 2.162388  | -0.004447 | -3.450219 |
| C  | -3.601162 | 2.099554  | 0.490390  |
| H  | -4.380285 | 1.970744  | 1.233068  |
| C  | -0.185992 | 0.000096  | 1.461936  |
| C  | 3.496592  | -3.170727 | 0.187526  |
| H  | 4.296362  | -3.887322 | 0.336388  |
| C  | -3.600925 | -2.099781 | 0.491782  |
| H  | -4.380147 | -1.970439 | 1.234257  |
| C  | -2.648549 | 3.199131  | -1.394956 |
| H  | -2.655410 | 3.954366  | -2.171217 |
| C  | 2.151334  | 0.001374  | 1.731210  |
| H  | 2.901188  | 0.002006  | 2.523087  |
| C  | -3.644812 | 3.126647  | -0.440810 |
| H  | -4.460136 | 3.841437  | -0.431362 |
| C  | -1.623932 | 2.270663  | -1.366866 |
| H  | -0.867400 | 2.268910  | -2.138958 |
| C  | -2.547775 | 1.209594  | 0.461315  |
| C  | 3.494951  | 3.172473  | 0.184134  |
| H  | 4.294265  | 3.889727  | 0.332289  |
| C  | -2.531642 | 0.000212  | 1.366595  |
| H  | -3.397718 | 0.000396  | 2.028136  |

|   |           |           |           |
|---|-----------|-----------|-----------|
| C | 2.628948  | -3.287349 | -0.881165 |
| H | 2.721250  | -4.084675 | -1.608134 |
| C | 2.627742  | 3.287046  | -0.885142 |
| H | 2.720025  | 4.083307  | -1.613279 |
| C | 3.333564  | 2.108941  | 1.057970  |
| H | 3.999522  | 1.959002  | 1.899708  |
| C | -1.023137 | 0.002418  | 3.513874  |
| H | -1.795820 | 0.003093  | 4.265802  |
| C | 3.334936  | -2.106055 | 1.059942  |
| H | 4.001051  | -1.954608 | 1.901289  |

**Table S4: [(Py4Im)Co(SCN)]<sup>2+</sup>**

Imaginary frequencies 0

E -1928.451077

G 298.15 K, 1 atm -1928.08628

|    |           |           |           |
|----|-----------|-----------|-----------|
| Co | 0.013994  | 0.071195  | 0.165094  |
| S  | -0.915774 | 2.090866  | 4.313478  |
| N  | 1.511420  | 1.301186  | -0.338639 |
| N  | 1.342156  | -0.996658 | -2.106478 |
| N  | -0.782279 | -1.095896 | -2.297366 |
| N  | -1.467836 | 1.169241  | -0.621499 |
| N  | -1.466359 | -1.233278 | 0.516863  |
| N  | 1.517031  | -1.096980 | 0.786905  |
| N  | -0.194083 | 0.886755  | 1.896802  |
| C  | 1.555598  | 2.570743  | 0.078417  |
| H  | 0.774321  | 2.903935  | 0.746534  |
| C  | 2.575901  | 3.433615  | -0.276972 |
| H  | 2.554857  | 4.452503  | 0.088976  |
| C  | 3.600923  | 2.968166  | -1.077973 |
| H  | 4.412574  | 3.620890  | -1.378732 |
| C  | 3.588081  | 1.637715  | -1.467985 |
| H  | 4.386719  | 1.210133  | -2.062966 |
| C  | 2.538243  | 0.833349  | -1.077969 |
| C  | 2.548658  | -0.646017 | -1.375941 |
| H  | 3.427903  | -0.916209 | -1.960718 |
| C  | 1.088535  | -1.581087 | -3.340288 |
| H  | 1.879717  | -1.891641 | -4.003244 |
| C  | -0.259890 | -1.643657 | -3.461674 |
| H  | -0.887981 | -2.020248 | -4.252686 |
| C  | 0.201803  | -0.716506 | -1.503427 |
| C  | -2.127578 | -0.860700 | -1.799526 |
| H  | -2.857416 | -1.209073 | -2.529717 |
| C  | -2.304212 | 0.612247  | -1.521968 |
| C  | -3.335088 | 1.320518  | -2.103422 |
| H  | -3.977329 | 0.824031  | -2.821596 |
| C  | -3.529860 | 2.645946  | -1.746969 |
| H  | -4.329801 | 3.223620  | -2.195991 |
| C  | -2.700524 | 3.203678  | -0.793247 |
| H  | -2.826928 | 4.223806  | -0.452757 |
| C  | -1.689005 | 2.434246  | -0.248721 |
| H  | -1.062403 | 2.844366  | 0.529740  |
| C  | -2.304069 | -1.576341 | -0.483493 |
| C  | -3.338368 | -2.470542 | -0.302414 |
| H  | -3.980707 | -2.710225 | -1.142065 |
| C  | -3.535373 | -3.030495 | 0.950466  |
| H  | -4.337834 | -3.740610 | 1.114856  |
| C  | -2.704805 | -2.645978 | 1.985581  |
| H  | -2.833119 | -3.025133 | 2.991739  |
| C  | -1.689978 | -1.741396 | 1.733408  |
| H  | -1.062885 | -1.396655 | 2.542725  |

|   |           |           |           |
|---|-----------|-----------|-----------|
| C | -0.501665 | 1.391554  | 2.911131  |
| C | 2.547344  | -1.357793 | -0.044449 |
| C | 3.604638  | -2.161560 | 0.327655  |
| H | 4.407041  | -2.338887 | -0.378901 |
| C | 3.619595  | -2.712345 | 1.599995  |
| H | 4.437169  | -3.352428 | 1.911772  |
| C | 2.587786  | -2.406917 | 2.466483  |
| H | 2.566804  | -2.779174 | 3.483081  |
| C | 1.561433  | -1.590498 | 2.028468  |
| H | 0.774759  | -1.299387 | 2.709656  |

**Table S5: [(Py4Im)Co(ONO)]<sup>2+</sup>**

Imaginary frequencies 0

E -1642.513005

G 298.15 K, 1 atm -1642.145771

|    |           |           |           |
|----|-----------|-----------|-----------|
| Co | -0.020364 | 0.000321  | -0.343703 |
| O  | -0.053116 | 0.000637  | -2.291837 |
| N  | -1.528372 | -1.311313 | -0.338237 |
| N  | 0.928617  | -0.001367 | 2.334318  |
| C  | 2.364460  | 1.212061  | 0.821019  |
| C  | 0.479670  | -0.003294 | 3.648804  |
| H  | 1.157118  | -0.004367 | 4.487443  |
| N  | 1.459423  | 1.341894  | -0.171145 |
| N  | -1.204690 | -0.000971 | 2.239558  |
| C  | -0.874405 | -0.003082 | 3.588748  |
| H  | -1.623118 | -0.003992 | 4.364430  |
| C  | 2.241354  | -0.001173 | 1.707842  |
| H  | 3.016240  | -0.001648 | 2.475707  |
| C  | 3.540235  | 3.161087  | 0.107783  |
| H  | 4.349058  | 3.873718  | 0.223166  |
| C  | 2.630568  | 3.280802  | -0.924828 |
| H  | 2.697002  | 4.076763  | -1.656119 |
| C  | -0.103946 | -0.000081 | 1.511464  |
| C  | 1.612860  | 2.351785  | -1.034728 |
| H  | 0.915392  | 2.420815  | -1.856286 |
| C  | 3.407223  | 2.099190  | 0.988314  |
| H  | 4.105594  | 1.945358  | 1.802508  |
| C  | -2.454539 | -0.000636 | 1.497491  |
| H  | -3.296440 | -0.000913 | 2.190095  |
| O  | 0.937563  | 0.003553  | -4.135977 |
| N  | -1.528482 | 1.311619  | -0.337282 |
| N  | 1.459327  | -1.341656 | -0.172801 |
| N  | 1.072997  | 0.003222  | -2.934146 |
| C  | -3.558735 | -2.092418 | 0.644485  |
| H  | -4.313685 | -1.966699 | 1.412079  |
| C  | 2.364258  | -1.213392 | 0.819647  |
| C  | -2.502459 | -1.207633 | 0.590472  |
| C  | -1.640544 | -2.257347 | -1.274911 |
| H  | -0.905245 | -2.261669 | -2.066764 |
| C  | 1.612856  | -2.350276 | -1.037884 |
| H  | 0.915564  | -2.418008 | -1.859717 |
| C  | 3.406820  | -2.100948 | 0.985908  |
| H  | 4.105086  | -1.948347 | 1.800428  |
| C  | -3.637646 | 3.109956  | -0.292433 |
| H  | -4.456410 | 3.820197  | -0.263715 |
| C  | -2.672638 | 3.179136  | -1.278265 |
| H  | -2.708095 | 3.926779  | -2.060903 |
| C  | -2.502419 | 1.207173  | 0.591522  |
| C  | 2.630397  | -3.279612 | -0.929123 |
| H  | 2.696882  | -4.074487 | -1.661588 |

|   |           |           |           |
|---|-----------|-----------|-----------|
| C | -3.637650 | -3.109603 | -0.295248 |
| H | -4.456427 | -3.819855 | -0.267229 |
| C | -2.672449 | -3.178029 | -1.280944 |
| H | -2.707747 | -3.925074 | -2.064161 |
| C | -1.640753 | 2.258418  | -1.273158 |
| H | -0.905687 | 2.263242  | -2.065220 |
| C | -3.558619 | 2.091994  | 0.646449  |
| H | -4.313427 | 1.965719  | 1.414097  |
| C | 3.539829  | -3.161605 | 0.103895  |
| H | 4.348484  | -3.874564 | 0.218438  |



**Table S6: [(Py4Im)Co(F)]<sup>2+</sup>**

Imaginary frequencies 0

E -1537.291099

G 298.15 K, 1 atm -1536.930015

|    |           |           |           |
|----|-----------|-----------|-----------|
| Co | 0.000011  | 0.000083  | -0.516992 |
| F  | -0.000043 | -0.000158 | -2.394448 |
| N  | -1.488418 | -1.313816 | -0.433772 |
| N  | 1.488571  | 1.313959  | -0.433845 |
| N  | 1.490877  | -1.299140 | -0.470307 |
| N  | -1.068248 | 0.019221  | 2.111288  |
| C  | 1.633207  | -2.213352 | -1.432404 |
| H  | 0.931680  | -2.164829 | -2.253628 |
| N  | -1.491086 | 1.299163  | -0.470275 |
| C  | 2.348373  | -0.023320 | 1.416622  |
| H  | 3.164872  | -0.033877 | 2.139654  |
| N  | 1.068728  | -0.018580 | 2.111109  |
| C  | 1.617601  | 2.280862  | -1.344943 |
| H  | 0.896462  | 2.296996  | -2.149429 |
| C  | 0.000172  | 0.000102  | 1.335319  |
| C  | -1.633781 | 2.213325  | -1.432353 |
| H  | -0.932303 | 2.165216  | -2.253647 |
| C  | 3.578654  | -3.110289 | -0.390266 |
| H  | 4.389559  | -3.828933 | -0.347709 |
| C  | 2.425532  | -1.221599 | 0.498100  |
| C  | 0.678140  | -0.010221 | 3.444794  |
| H  | 1.389888  | -0.020888 | 4.254513  |
| C  | -1.617871 | -2.280352 | -1.345195 |
| H  | -0.897086 | -2.296069 | -2.150019 |
| C  | 2.645685  | 3.205534  | -1.301922 |
| H  | 2.699080  | 3.972485  | -2.064767 |
| C  | 2.432718  | 1.194388  | 0.522833  |
| C  | -2.425662 | 1.221381  | 0.498196  |
| C  | -2.347977 | 0.023284  | 1.416961  |
| H  | -3.164396 | 0.033720  | 2.140089  |
| C  | -3.472547 | 2.116036  | 0.572529  |
| H  | -4.199383 | 2.015941  | 1.370522  |
| C  | -0.677428 | 0.011293  | 3.444900  |
| H  | -1.389024 | 0.022326  | 4.254748  |
| C  | -3.585003 | -3.116407 | -0.292468 |
| H  | -4.400149 | -3.828457 | -0.227444 |
| C  | -2.432138 | -1.194567 | 0.523370  |
| C  | 3.484293  | 2.080499  | 0.624352  |
| H  | 4.217473  | 1.944290  | 1.410953  |
| C  | 2.657144  | -3.143100 | -1.419759 |
| H  | 2.724285  | -3.867673 | -2.221915 |
| C  | -3.483417 | -2.080986 | 0.625304  |
| H  | -4.216182 | -1.945169 | 1.412357  |
| C  | 3.472033  | -2.116698 | 0.572487  |
| H  | 4.198942  | -2.016840 | 1.370447  |

|   |           |           |           |
|---|-----------|-----------|-----------|
| C | -3.579624 | 3.109509  | -0.390289 |
| H | -4.390876 | 3.827763  | -0.347807 |
| C | -2.645823 | -3.205158 | -1.301921 |
| H | -2.699644 | -3.971738 | -2.065110 |
| C | 3.585552  | 3.116174  | -0.293165 |
| H | 4.400931  | 3.827985  | -0.228445 |
| C | -2.658090 | 3.142674  | -1.419750 |
| H | -2.725462 | 3.867210  | -2.221918 |

**Table S7: [(Py4Im)Co(OH<sub>2</sub>)]<sup>3+</sup>**

Imaginary frequencies 0

E -1513.706242

G 298.15 K, 1 atm -1513.320315

|    |           |           |           |
|----|-----------|-----------|-----------|
| Co | -0.000311 | -0.002243 | -0.532162 |
| O  | -0.017012 | -0.167078 | -2.540492 |
| H  | 0.663808  | 0.300417  | -3.041898 |
| H  | -0.856958 | 0.019003  | -2.981438 |
| N  | -1.064074 | 0.036554  | 2.085529  |
| N  | 1.512672  | -1.313551 | -0.465440 |
| N  | -1.491203 | -1.343937 | -0.409928 |
| N  | 1.073041  | -0.003822 | 2.083132  |
| N  | -1.510920 | 1.313624  | -0.474968 |
| N  | 1.491609  | 1.345545  | -0.427240 |
| C  | -2.438718 | -1.200112 | 0.540883  |
| C  | 2.443825  | 1.210083  | 0.520116  |
| C  | 2.448157  | -1.210285 | 0.500820  |
| C  | 1.661484  | -2.265345 | -1.393605 |
| H  | 0.956091  | -2.276787 | -2.211675 |
| C  | 2.359325  | -0.008240 | 1.406142  |
| H  | 3.163953  | -0.013114 | 2.142780  |
| C  | -0.671241 | 0.029908  | 3.417327  |
| H  | -1.384803 | 0.042976  | 4.225413  |
| C  | -2.352430 | 0.028439  | 1.412490  |
| H  | -3.154808 | 0.041847  | 2.151473  |
| C  | 0.003696  | 0.014890  | 1.309896  |
| C  | 2.623537  | 3.288559  | -1.227613 |
| H  | 2.655353  | 4.087401  | -1.958021 |
| C  | -3.486388 | -2.085809 | 0.673752  |
| H  | -4.218720 | -1.923149 | 1.455800  |
| C  | 3.502813  | -2.092811 | 0.599408  |
| H  | 4.224642  | -1.965589 | 1.397738  |
| C  | -2.690180 | 3.179894  | -1.379279 |
| H  | -2.753804 | 3.924548  | -2.162912 |
| C  | -1.607514 | -2.360684 | -1.271339 |
| H  | -0.877233 | -2.428828 | -2.064841 |
| C  | 2.695084  | -3.182957 | -1.356386 |
| H  | 2.760239  | -3.932884 | -2.134934 |
| C  | -1.657908 | 2.261060  | -1.408135 |
| H  | -0.949498 | 2.275295  | -2.224939 |
| C  | 1.601232  | 2.360117  | -1.292024 |
| H  | 0.865697  | 2.427296  | -2.081048 |
| C  | -2.445319 | 1.219761  | 0.493104  |
| C  | -2.630934 | -3.287220 | -1.194429 |
| H  | -2.668932 | -4.089793 | -1.920470 |
| C  | 3.491152  | 2.098112  | 0.641656  |
| H  | 4.227202  | 1.941676  | 1.421511  |
| C  | -3.581007 | -3.157965 | -0.200273 |
| H  | -4.393337 | -3.870243 | -0.110089 |

|   |           |           |           |
|---|-----------|-----------|-----------|
| C | 3.621662  | -3.110767 | -0.334532 |
| H | 4.439313  | -3.820074 | -0.272910 |
| C | 0.683463  | 0.007616  | 3.415792  |
| H | 1.398952  | -0.001593 | 4.222231  |
| C | 3.580326  | 3.165021  | -0.239175 |
| H | 4.392907  | 3.878104  | -0.158116 |
| C | -3.498583 | 2.104936  | 0.585107  |
| H | -4.219358 | 1.985883  | 1.385682  |
| C | -3.617152 | 3.115210  | -0.356999 |
| H | -4.434383 | 3.825429  | -0.300833 |

**Table S8: [(Py4Im)Co(CO<sub>3</sub>)]<sup>+</sup>**

Imaginary frequencies 0

E -1701.362433

G 298.15 K, 1 atm -1700.991655

|    |           |           |           |
|----|-----------|-----------|-----------|
| Co | -0.360954 | 0.156426  | -0.566126 |
| N  | 0.822039  | 0.106132  | 2.099806  |
| N  | -1.531638 | -1.441463 | -0.685325 |
| C  | 0.907932  | 2.639143  | -1.240235 |
| H  | 0.180660  | 2.532067  | -2.033626 |
| C  | -2.328548 | 2.319182  | -0.724305 |
| H  | -1.632452 | 2.694681  | -1.462558 |
| C  | 0.443294  | -0.148785 | 3.409170  |
| H  | 1.127445  | -0.022487 | 4.233341  |
| C  | -0.180137 | -0.163832 | 1.273911  |
| O  | 1.087736  | -0.798326 | -1.353837 |
| O  | -0.314019 | 0.370236  | -2.504918 |
| N  | 0.944914  | 1.652224  | -0.331550 |
| C  | 0.778276  | -0.347808 | -2.555444 |
| O  | 1.425701  | -0.595261 | -3.565433 |
| C  | 1.764269  | 3.721434  | -1.219656 |
| H  | 1.672844  | 4.483200  | -1.984100 |
| C  | 1.905953  | 1.695148  | 0.617511  |
| C  | -3.276184 | -2.773434 | 0.253197  |
| H  | -3.988820 | -2.914554 | 1.057982  |
| C  | -2.436258 | -1.678459 | 0.281231  |
| C  | 2.715090  | 3.795690  | -0.220359 |
| H  | 3.399686  | 4.634304  | -0.158848 |
| C  | -2.245362 | -3.425310 | -1.792739 |
| H  | -2.129659 | -4.091200 | -2.638936 |
| C  | -3.180836 | -3.665179 | -0.803224 |
| H  | -3.826877 | -4.534839 | -0.848031 |
| C  | 2.783165  | 2.764596  | 0.699644  |
| H  | 3.527883  | 2.769114  | 1.488539  |
| C  | -1.438177 | -2.307117 | -1.700987 |
| H  | -0.703005 | -2.110825 | -2.469172 |
| N  | -1.206197 | -0.552181 | 2.029095  |
| N  | -2.013028 | 1.176985  | -0.107208 |
| C  | -2.879919 | 0.667412  | 0.787328  |
| C  | 2.915294  | -0.599477 | 1.029701  |
| C  | 2.100894  | 0.559499  | 1.601048  |
| H  | 2.647653  | 0.964616  | 2.460213  |
| C  | -2.511375 | -0.665003 | 1.391118  |
| H  | -3.249037 | -0.965985 | 2.135453  |
| C  | -4.383160 | 2.489214  | 0.470648  |
| H  | -5.308999 | 3.004214  | 0.701823  |
| C  | -0.848540 | -0.545763 | 3.369559  |
| H  | -1.536641 | -0.828826 | 4.149636  |
| C  | -4.068759 | 1.294220  | 1.099985  |
| H  | -4.732510 | 0.839902  | 1.826812  |

|   |           |           |           |
|---|-----------|-----------|-----------|
| C | -3.500051 | 3.004739  | -0.460122 |
| H | -3.705116 | 3.926983  | -0.989631 |
| C | 4.318475  | -2.709027 | 0.048375  |
| H | 4.837093  | -3.582788 | -0.329549 |
| C | 3.230149  | -2.852065 | 0.890819  |
| H | 2.895926  | -3.843544 | 1.188140  |
| C | 4.722157  | -1.425279 | -0.286106 |
| H | 5.576418  | -1.263340 | -0.935257 |
| N | 2.537460  | -1.822901 | 1.382962  |
| C | 4.012868  | -0.348073 | 0.215046  |
| H | 4.300017  | 0.667056  | -0.038475 |

**Table S9: [(Py4Im)Co(N<sub>3</sub>)<sub>3</sub>]**

Imaginary frequencies 0

E -1930.196221

G 298.15 K, 1 atm -1929.815115

|    |           |           |           |
|----|-----------|-----------|-----------|
| Co | 1.195756  | 0.122541  | 0.680441  |
| N  | 0.631210  | -0.434304 | -2.010857 |
| N  | -1.269992 | -0.442001 | -1.031800 |
| N  | 2.122319  | 1.445203  | -0.466156 |
| N  | 2.488584  | -1.236882 | 0.019957  |
| N  | -0.445732 | 1.476169  | 2.363610  |
| N  | -0.917318 | 1.460321  | 3.412627  |
| N  | 0.260040  | -1.176380 | 1.798068  |
| N  | 2.306469  | 0.140782  | 3.243805  |
| N  | 2.191246  | -0.287032 | 4.308768  |
| N  | 0.149246  | -3.417693 | 1.107623  |
| N  | 2.475304  | 0.593346  | 2.153230  |
| N  | -0.008244 | 1.546191  | 1.252867  |
| C  | 0.046243  | -0.273655 | -0.814975 |
| N  | 0.210119  | -2.313418 | 1.420024  |
| C  | 3.117647  | 3.579305  | -0.775541 |
| H  | 3.354779  | 4.551415  | -0.360398 |
| C  | 3.108371  | -2.079497 | 0.853321  |
| H  | 2.850151  | -2.014331 | 1.904168  |
| C  | -4.651745 | -0.739137 | -0.896623 |
| H  | -4.763881 | 0.275386  | -1.265143 |
| C  | 3.152163  | 1.976332  | -2.545903 |
| H  | 3.412288  | 1.662654  | -3.550510 |
| C  | 2.074634  | -0.278692 | -2.155735 |
| H  | 2.336531  | -0.433204 | -3.203743 |
| C  | 2.782356  | -1.283865 | -1.287510 |
| C  | 2.466983  | 1.109761  | -1.717077 |
| C  | 4.038789  | -2.999722 | 0.408634  |
| H  | 4.512523  | -3.663202 | 1.121776  |
| C  | -3.486879 | -1.134704 | -0.252177 |
| C  | -2.321696 | -0.187428 | -0.042822 |
| H  | -1.881199 | -0.436613 | 0.929273  |
| C  | 3.483583  | 3.234398  | -2.065244 |
| H  | 4.018418  | 3.937029  | -2.694931 |
| C  | 2.436344  | 2.656754  | -0.002236 |
| H  | 2.130785  | 2.873109  | 1.014113  |
| C  | -0.304174 | -0.689002 | -2.998153 |
| H  | -0.025988 | -0.848211 | -4.027597 |
| N  | -3.304732 | -2.372745 | 0.215221  |
| C  | -1.501264 | -0.686181 | -2.378991 |
| H  | -2.494426 | -0.837946 | -2.771715 |
| C  | 4.344873  | -3.047118 | -0.940752 |
| H  | 5.071155  | -3.758151 | -1.318812 |
| C  | 3.706759  | -2.170997 | -1.804422 |
| H  | 3.912042  | -2.166639 | -2.868941 |

|   |           |           |           |
|---|-----------|-----------|-----------|
| C | -5.485856 | -2.952882 | -0.586816 |
| H | -6.252793 | -3.711797 | -0.693651 |
| C | -4.288383 | -3.253435 | 0.044517  |
| H | -4.114859 | -4.253208 | 0.436318  |
| C | -5.667541 | -1.667983 | -1.067815 |
| H | -6.587243 | -1.387577 | -1.570775 |
| N | -2.451394 | 2.031922  | -1.076177 |
| C | -2.728582 | 1.269919  | -0.022827 |
| C | -3.397055 | 1.741650  | 1.103349  |
| H | -3.601768 | 1.070814  | 1.933000  |
| C | -3.762201 | 3.073806  | 1.147645  |
| H | -4.270855 | 3.477302  | 2.017332  |
| C | -2.813629 | 3.316711  | -1.020629 |
| H | -2.570910 | 3.923054  | -1.890714 |
| C | -3.459718 | 3.885529  | 0.062234  |
| H | -3.720169 | 4.937969  | 0.052658  |



Table S10: Calculated and experimental  $^{13}\text{C}$  chemical shifts for  $[(\text{Py4Im})\text{Co}(\text{F})]^{2+}$

| Calculated shifts / ppm | Experimental shifts / ppm | delta / ppm |
|-------------------------|---------------------------|-------------|
| 201.04                  | 158.0 (indirect)          | 43.04       |
| 129.61                  | 126.48                    | 3.13        |
| 70.91                   | 68.16                     | 2.75        |
| 159.65                  | 154.88                    | 4.77        |
| 132.62                  | 129.66                    | 2.96        |
| 148.03                  | 144.85                    | 3.18        |
| 131.15                  | 129.22                    | 1.93        |
| 158.14                  | 155.24                    | 2.90        |

Table S11: Calculated and experimental  $^{13}\text{C}$  chemical shifts for  $[(\text{Py4Im})\text{Co}(\text{OH})]^{2+}$

| Calculated shifts / ppm | Experimental shifts / ppm | delta |
|-------------------------|---------------------------|-------|
| 204.83                  | 167.7 (indirect)          | 37.13 |
| 128.87                  | 122.70                    | 6.17  |
| 70.92                   | 65.28                     | 5.64  |
| 160.26                  | 152.47                    | 7.79  |
| 132.46                  | 126.15                    | 6.31  |
| 147.55                  | 141.17                    | 6.38  |
| 130.89                  | 125.64                    | 5.25  |
| 158.91                  | 153.23                    | 5.68  |

Table S12: Calculated and experimental  $^{13}\text{C}$  chemical shifts for  $[(\text{Py4Im})\text{Co}(\text{OH}_2)]^{3+}$

| Calculated shifts / ppm | Experimental shifts / ppm | delta |
|-------------------------|---------------------------|-------|
| 196.19                  | 155.4                     | 40.79 |
| 155.83                  | 152.72                    | 3.10  |
| 128.21                  | 126.68                    | 1.53  |
| 145.43                  | 142.45                    | 2.98  |
| 128.15                  | 127.35                    | 0.80  |
| 161.46                  | 151.72                    | 9.74  |
| 65.58                   | 65.39                     | 0.19  |
| 130.24                  | 123.98                    | 6.26  |

Table S13: Calculated and experimental  $^{13}\text{C}$  chemical shifts for  $[(\text{Py4Im})\text{Co}(\text{NCS})]^{2+}$

| <b>Calculated shifts / ppm</b> | <b>Experimental shifts / ppm</b> | <b>delta</b> |
|--------------------------------|----------------------------------|--------------|
| 198.73                         | 158.9                            | 39.83        |
| 129.83                         | 126.90                           | 2.93         |
| 71.03                          | 65.46                            | 5.57         |
| 159.12                         | 151.66                           | 7.46         |
| 133.23                         | 129.66                           | 3.57         |
| 148.52                         | 141.84                           | 6.68         |
| 131.72                         | 126.90                           | 4.82         |
| 159.86                         | 154.35                           | 5.51         |

Table S14: Calculated and experimental  $^{13}\text{C}$  chemical shifts for  $[(\text{Py4Im})\text{Co}(\text{N}_3)]^{2+}$

| <b>Calculated shifts / ppm</b> | <b>Experimental shifts / ppm</b> | <b>delta</b> |
|--------------------------------|----------------------------------|--------------|
| 202.8                          | 163.02                           | 39.78        |
| 128.86                         | 126.08                           | 2.78         |
| 64.98                          | 68.41                            | 3.43         |
| 161.56                         | 155.03                           | 6.53         |
| 128.15                         | 129.82                           | 1.67         |
| 144.99                         | 144.67                           | 0.32         |
| 129.2                          | 129.54                           | 0.34         |
| 157.72                         | 156.79                           | 0.93         |

**Figure S5: Selected molecular orbitals of [Co(PY4Im)Co(F)]<sup>2+</sup> and [Co(PY4Im)Co(N<sub>3</sub>)]<sup>2+</sup>**

Fluorido complex      Mayer bond order: C-0.879-Co-0.545-F

HOMO; Carbene C 14.9%, Co 14.2%, and F 3.30%

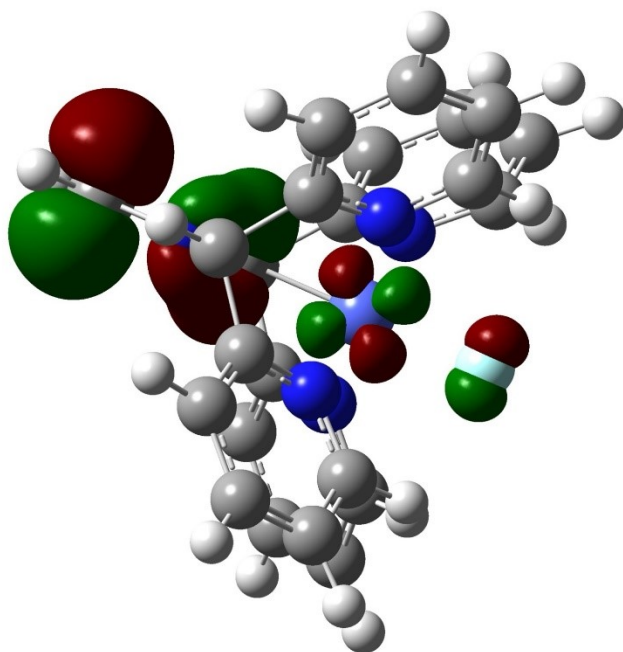

LUMO; Carbene 0.0160%, Co 61.5%, and F 0.00004%

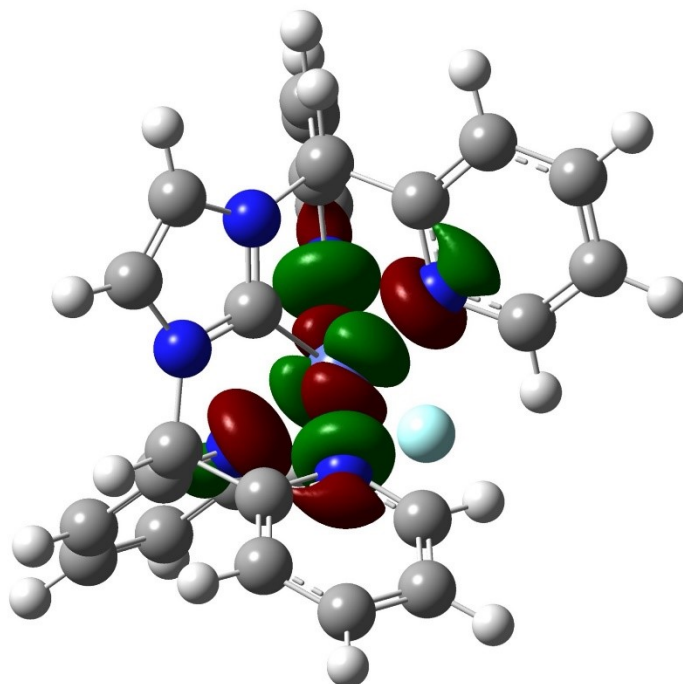

HOMO-7;  $\pi$  orbital between carbene 4.09% and Co 29.44% with an antibonding orbital between Co and F (26.8%)

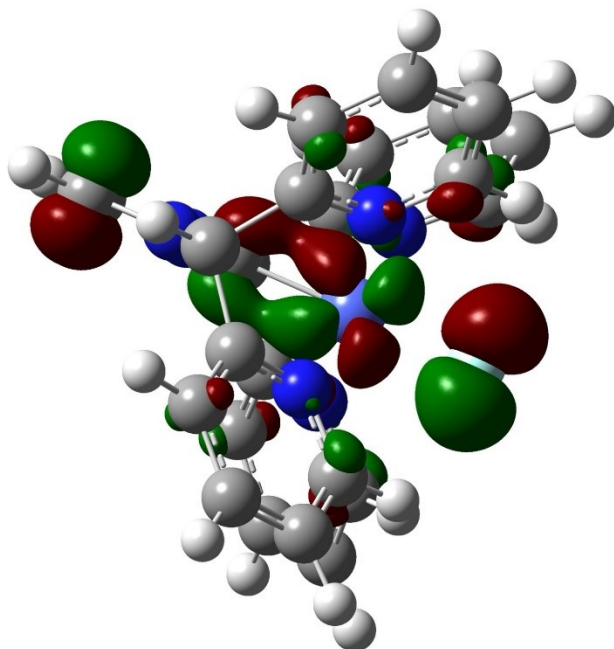

HOMO-13; mostly a bonding  $\pi$  orbital between Co (5.45%) and F (20.4%), Carbene (0.588%)

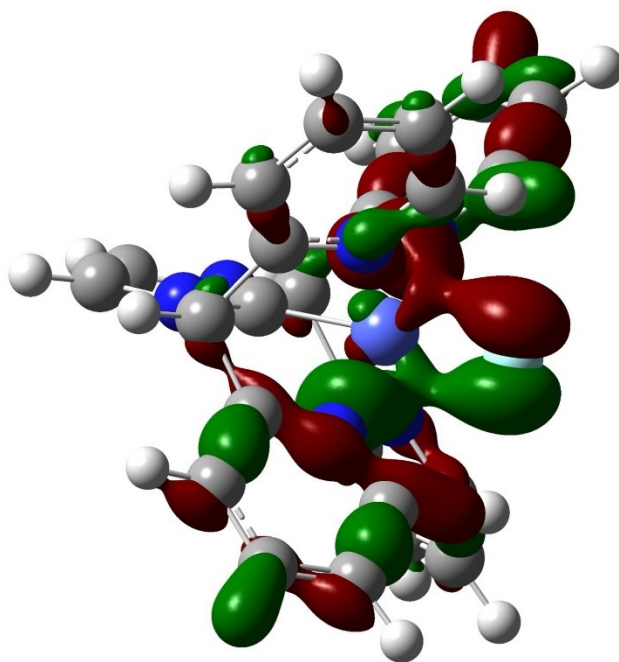

HOMO-14; very weak  $\pi$  bonding between Co (8.40%) and F (3.87%) and little on the carbene (0.243%)

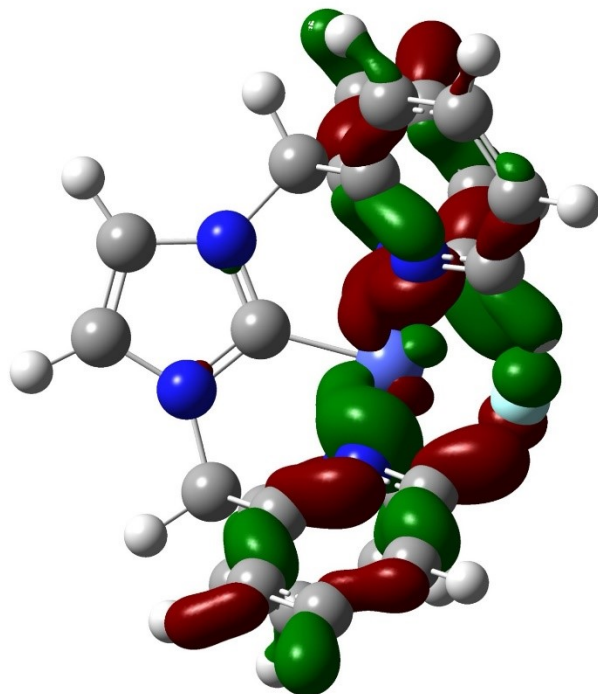

HOMO-16; significant  $\pi$  bonding Co (36.6%) and F (35.8%) and little on the carbene (0.449%)

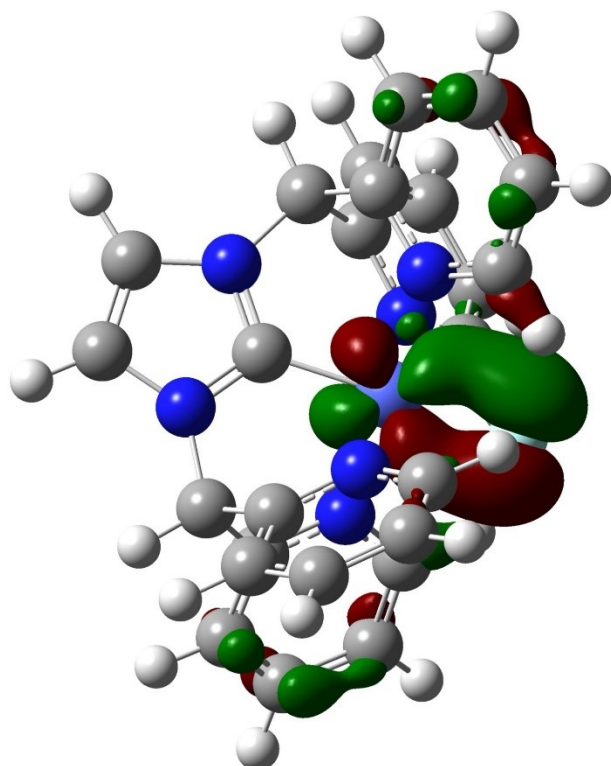

HOMO-17; significant  $\pi$  bonding Co (39.1%) and F (29.8%) with tiny bonding orbital between Co and C (1.51%)

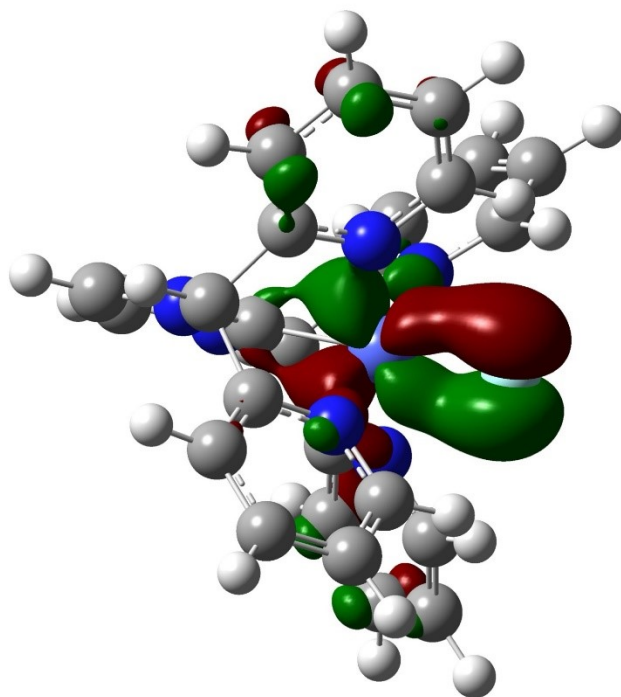

HOMO-23;  $\sigma$  bonding between Co (4.90%) and F (4.39%) with carbene (0.276%)

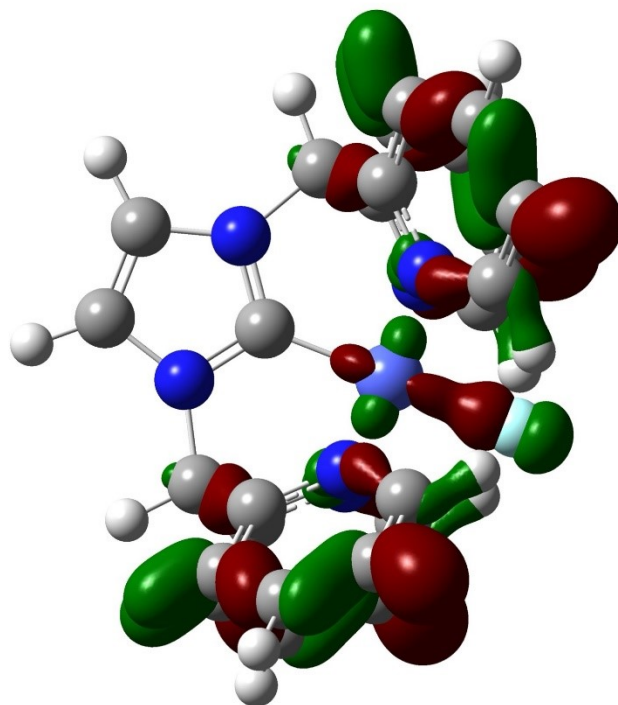

HOMO-24; strong  $\sigma$  bonding between Co (31.1%) and carbene (16.8%) with F (27.4%)

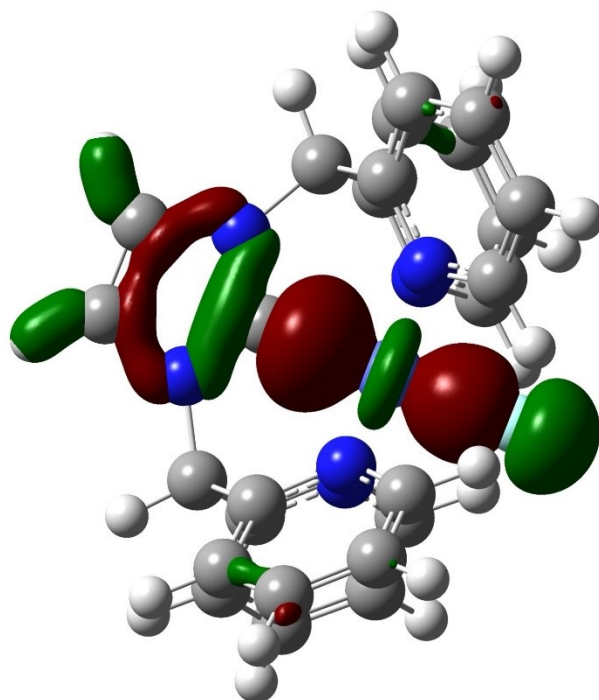

Azido complex Mayer bond order: C -0.836-Co-0.566-N(azide)

HOMO; Co (8.22%), N (azide donor) (45.7%), carbene (0.351%)

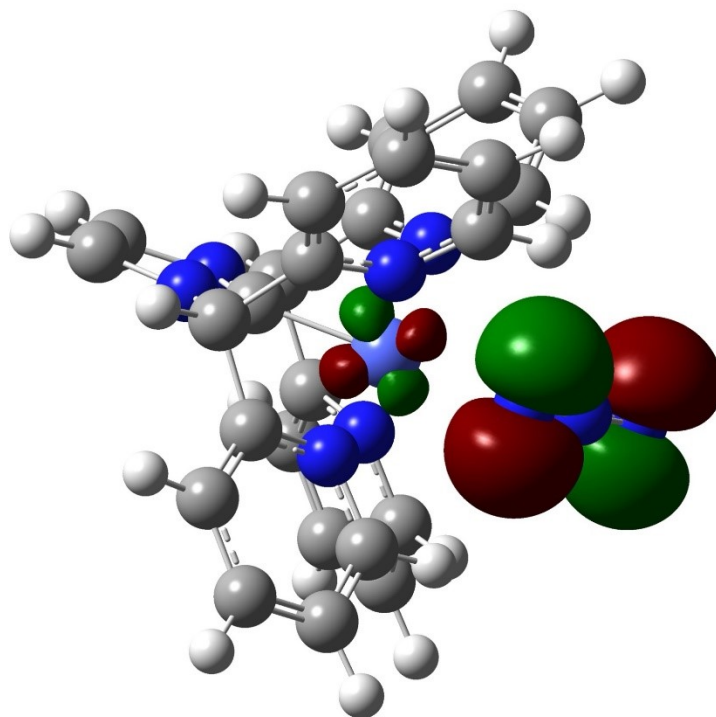

LUMO; Co (62.4%), N (azide donor) (0.00109%), carbene (0.00228%)

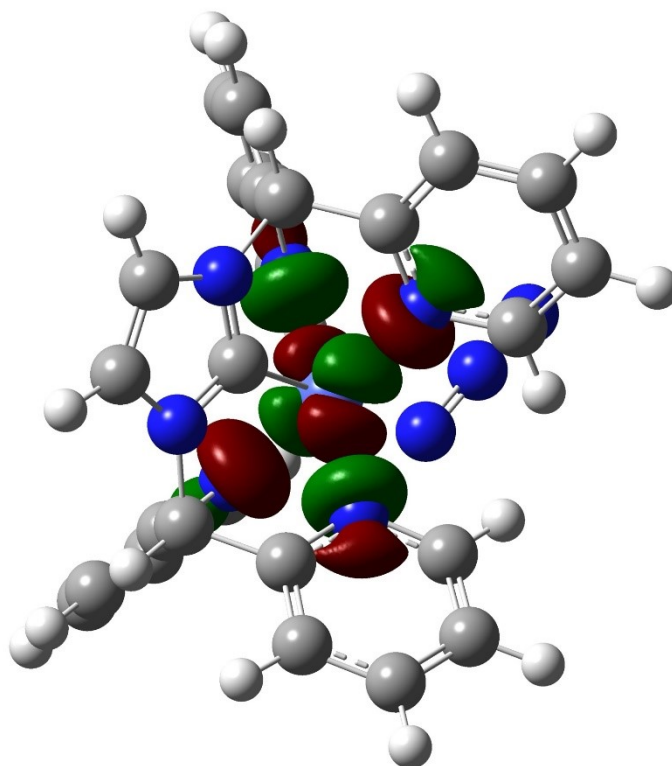



HOMO-1; Co (6.46%), N ((azide N) 49.0%), carbene (5.55%); Co-N  $\sigma$  bond.

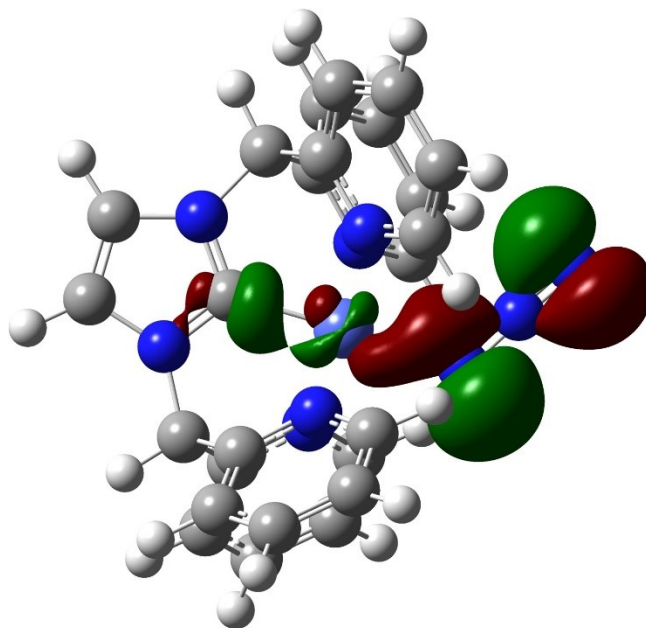

HOMO-2; Co (3.79%), N ((azide N) 2.34%), carbene (16.5%); very weak Co-N  $\pi$  bond.

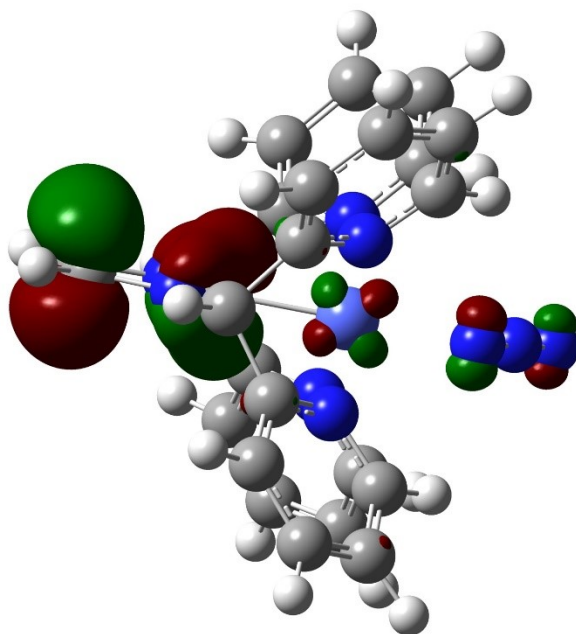

HOMO-12; Co (33.9%), N ((azide N) 1.91%), carbene (0.172%); weak Co-N  $\pi$  bond.

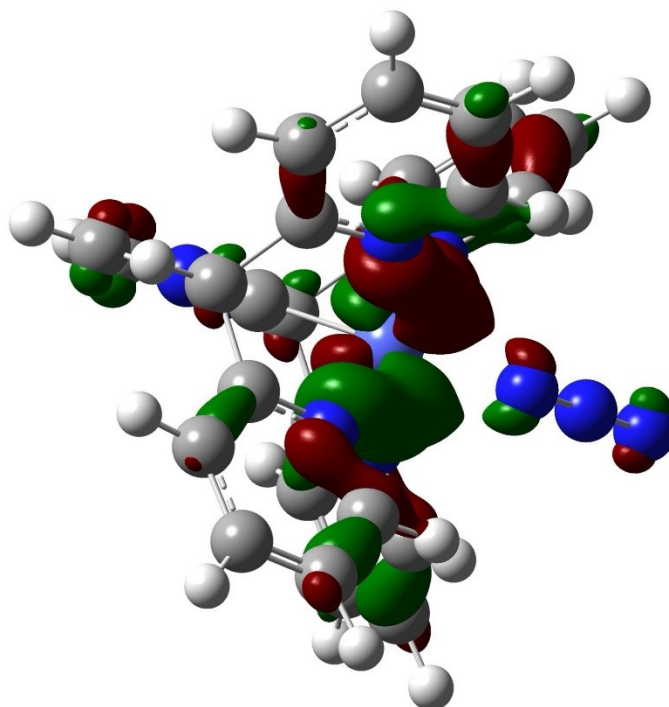

HOMO-16; Co (32.1%), N (azide N) 0.514%), carbene (2.75%); an extended  $\pi$  bond from the carbene C to the Co over the adjacent N donors from the ligand itself.

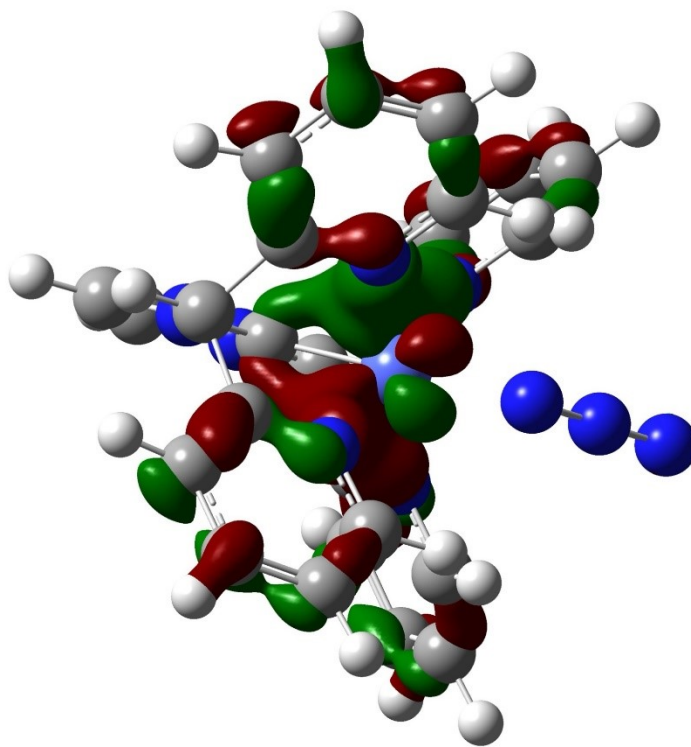

HOMO-18; Co (27.3%), N (azide donor) (6.06%) and carbene (19.9%); a strong Co-C  $\sigma$  bond.

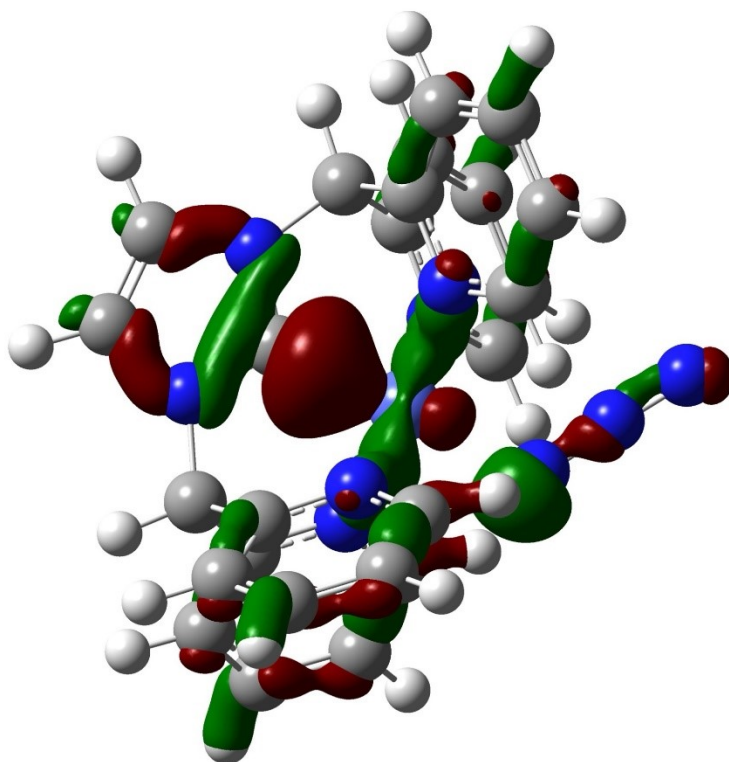

HOMO-24; Co (2.07%), N (azide donor) (1.88%) and carbene (4.78%); a weak N-Co-C  $\sigma$  bond.

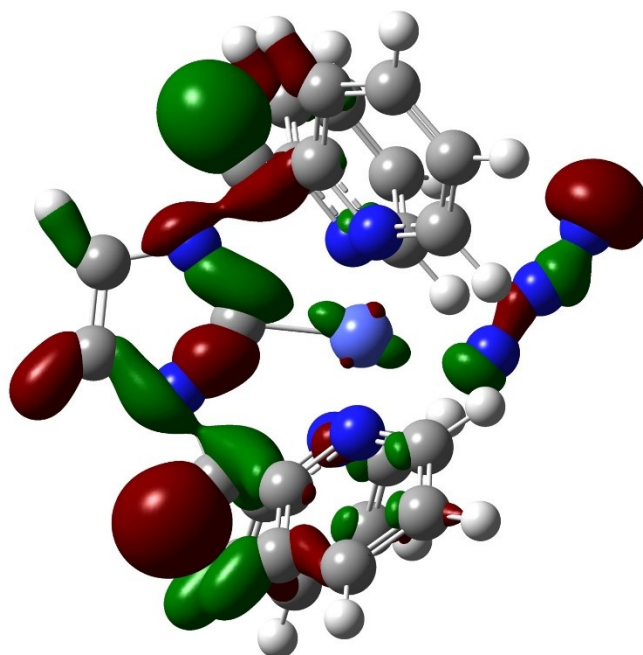

HOMO-25; Co (6.43%), N (azide donor) (9.29%) and carbene (3.12%); a banana  $\sigma$  bond over N-Co-C.

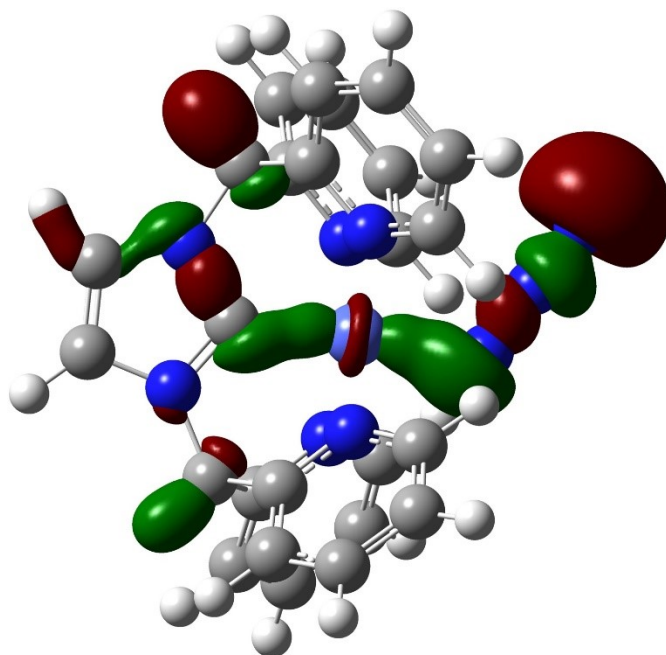

HOMO-37; Co (10.4%), N (azide donor) (3.01%) and carbene (0.761%); a weak N-Co  $\sigma$  bond.

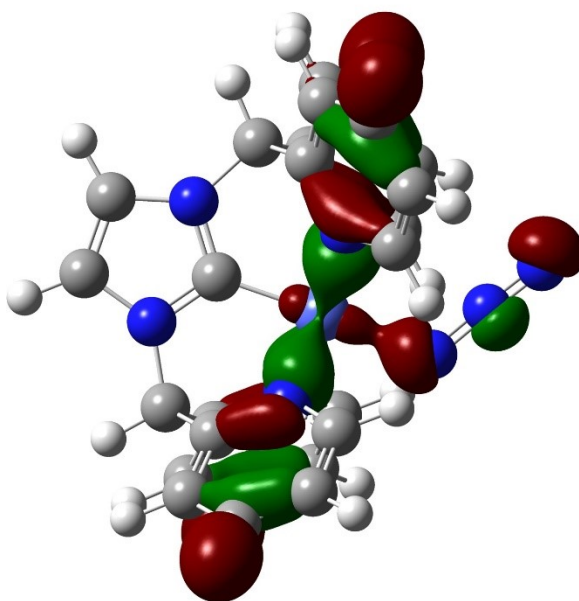

HOMO-43; Co (3.54%), N (azide donor) (23.4%) and carbene (0.572%); a N-Co  $\sigma$  bond.

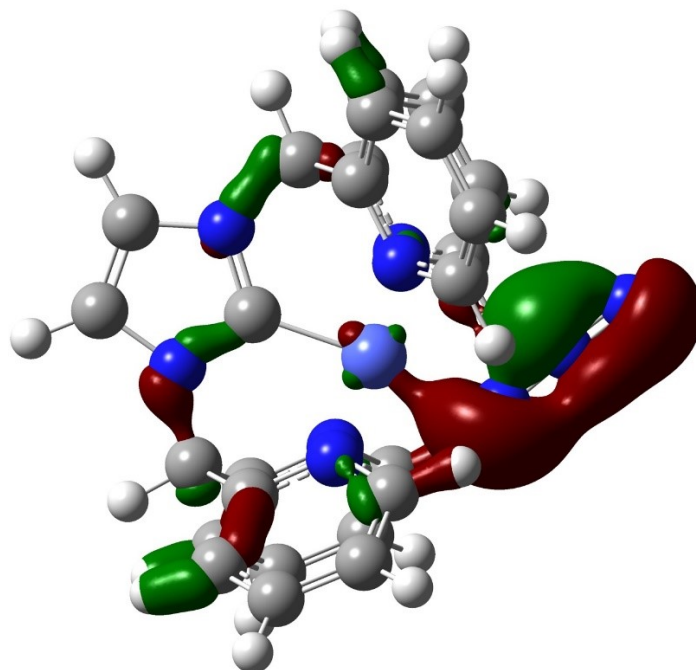

HOMO-46; Co (5.23%), N (azide donor) (15.7%) and carbene (0.361%); a N-Co  $\sigma$  bond.

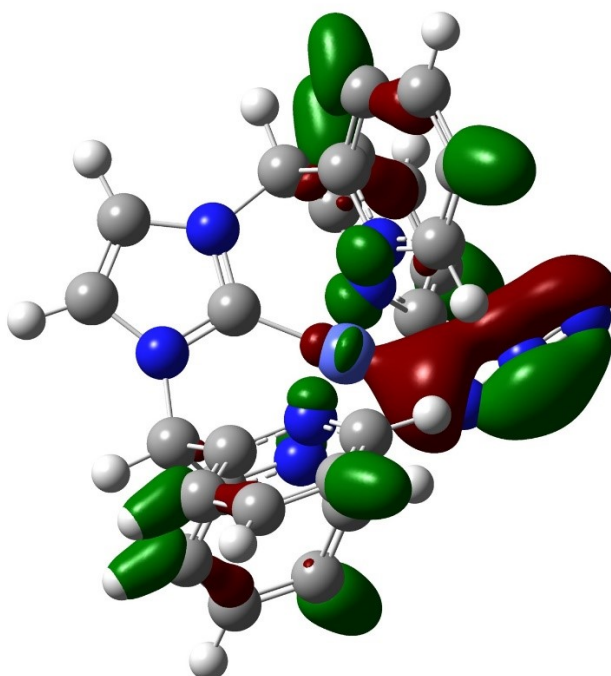

HOMO-49; Co (7.91%), N (azide donor) (16.3%) and carbene (1.25%); a N-Co-C  $\sigma$  bond.

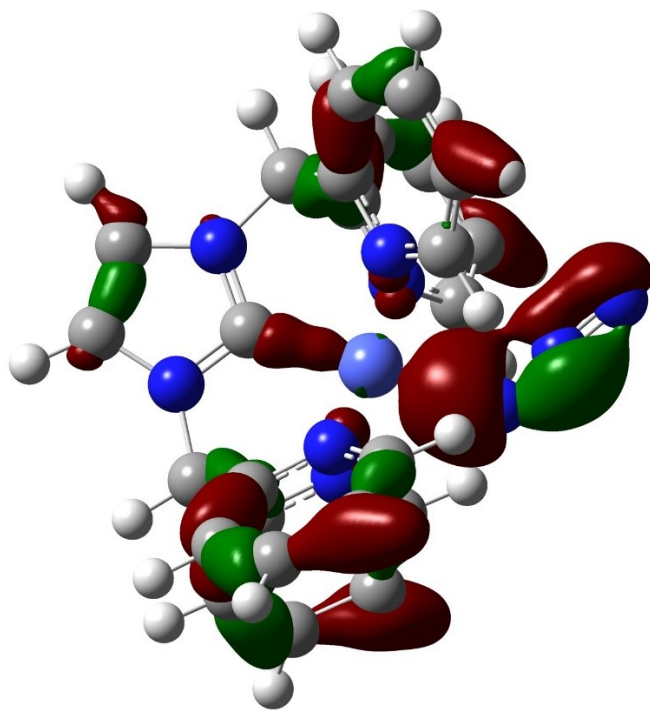

**Figure S6:**  $^1\text{H}$  and  $^{13}\text{C}$  spectra of  $[\text{Co}(\text{PY4Im})(\text{X})]^{2+}$  complexes in  $\text{D}_2\text{O}$

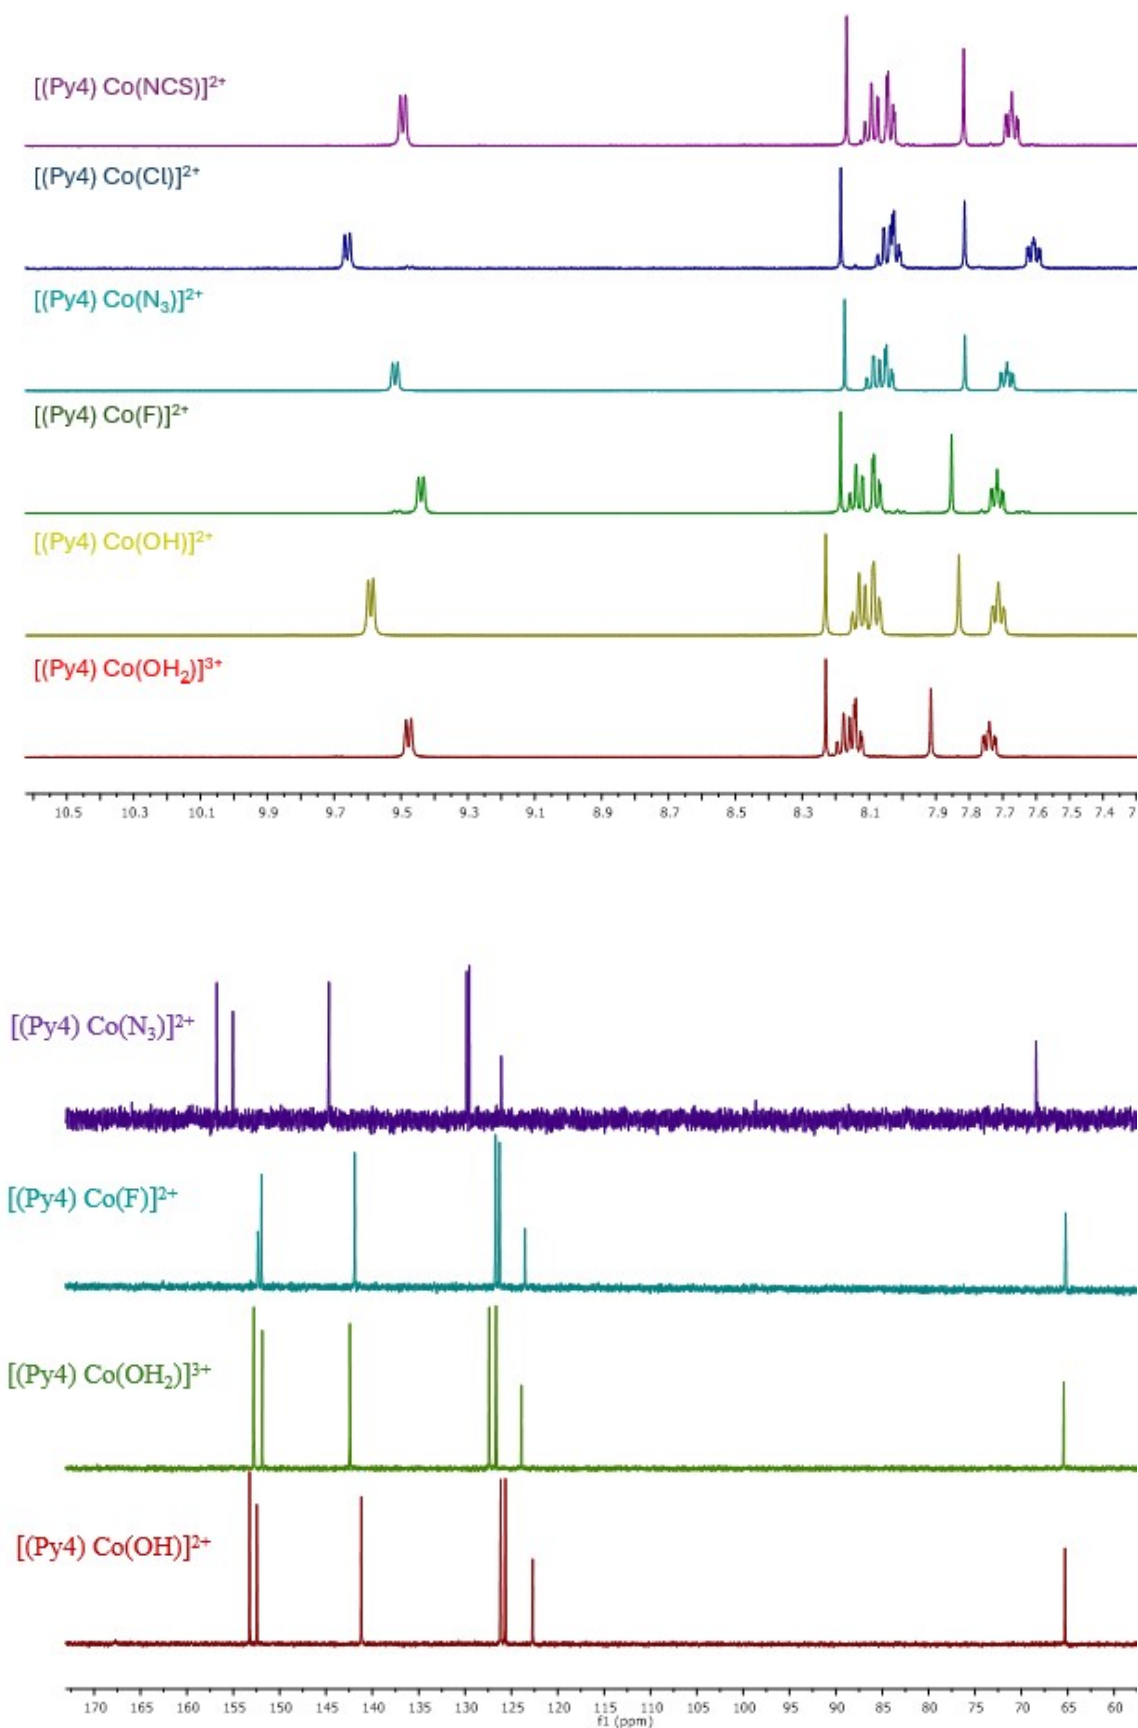

**Figure S7:**  $^1\text{H}$  and  $^{13}\text{C}$  spectra of  $[\text{Co}(\text{PY4Im})(\text{N}_3)_3]$  in  $\text{d}^6\text{-DMSO}$

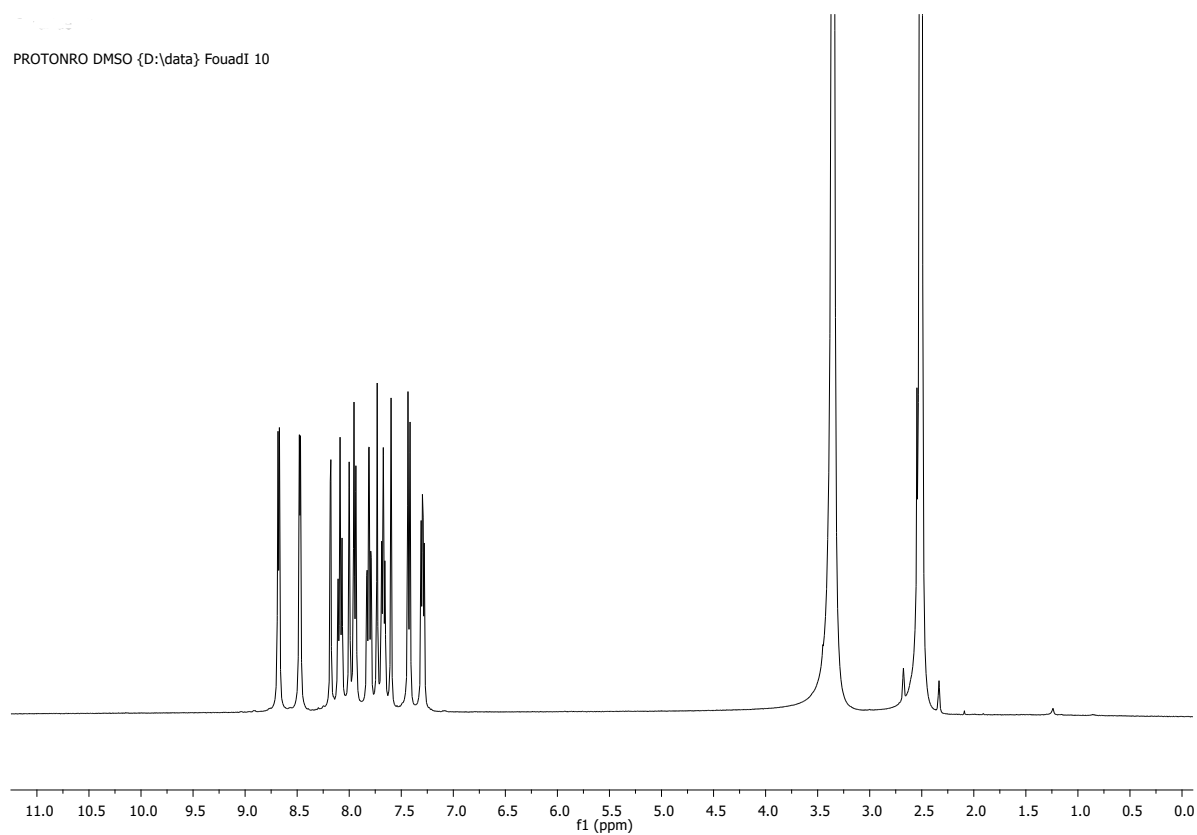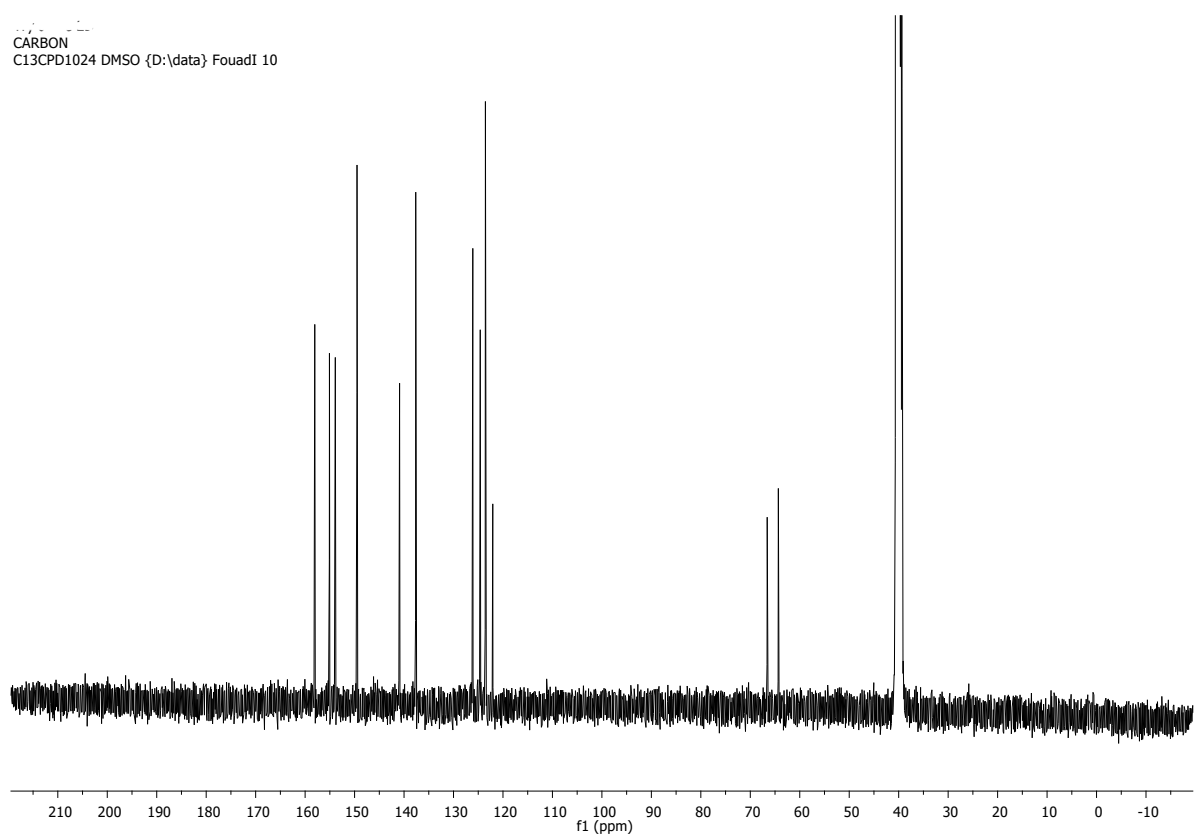



**Figure S8:**  $^1\text{H}$  and  $^{13}\text{C}$  spectra of  $[\text{Co}(\text{PY4Im})(\text{O}_2\text{CO})]^+$  in  $\text{d}^7\text{-DMF}$

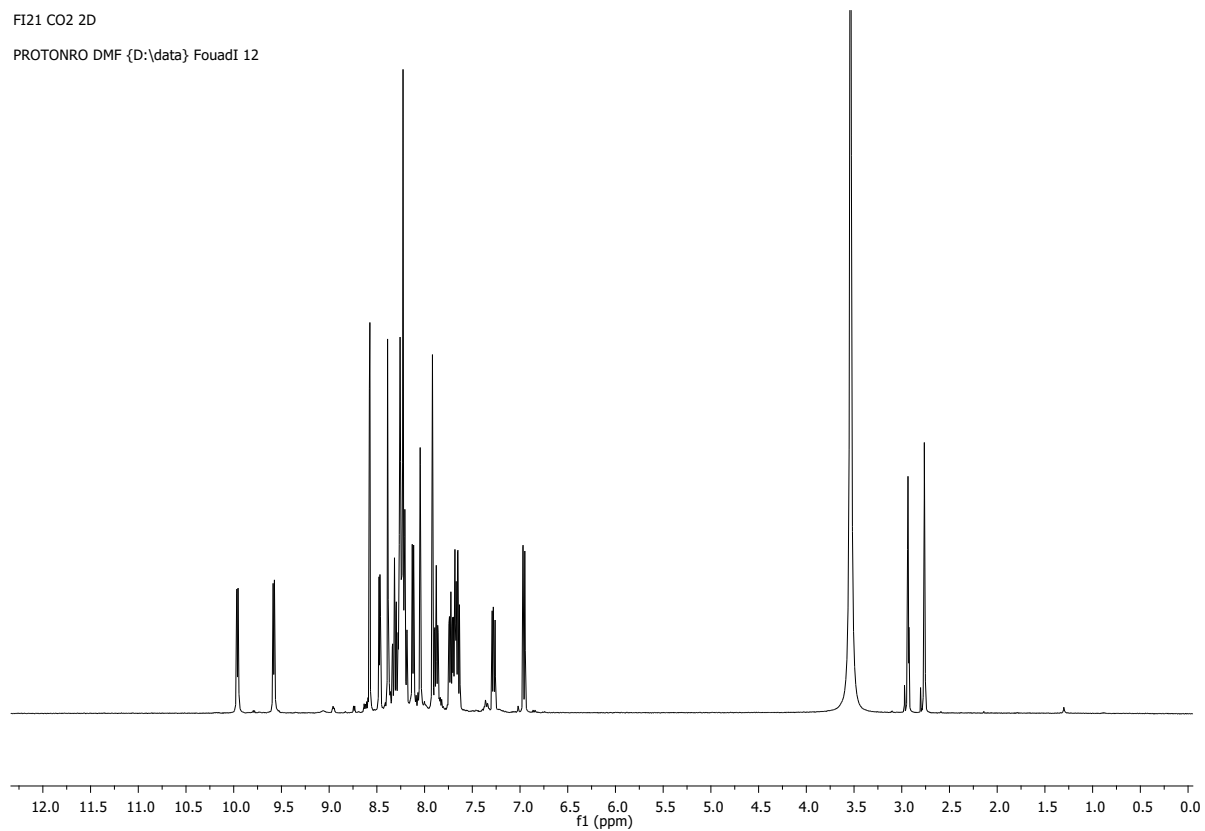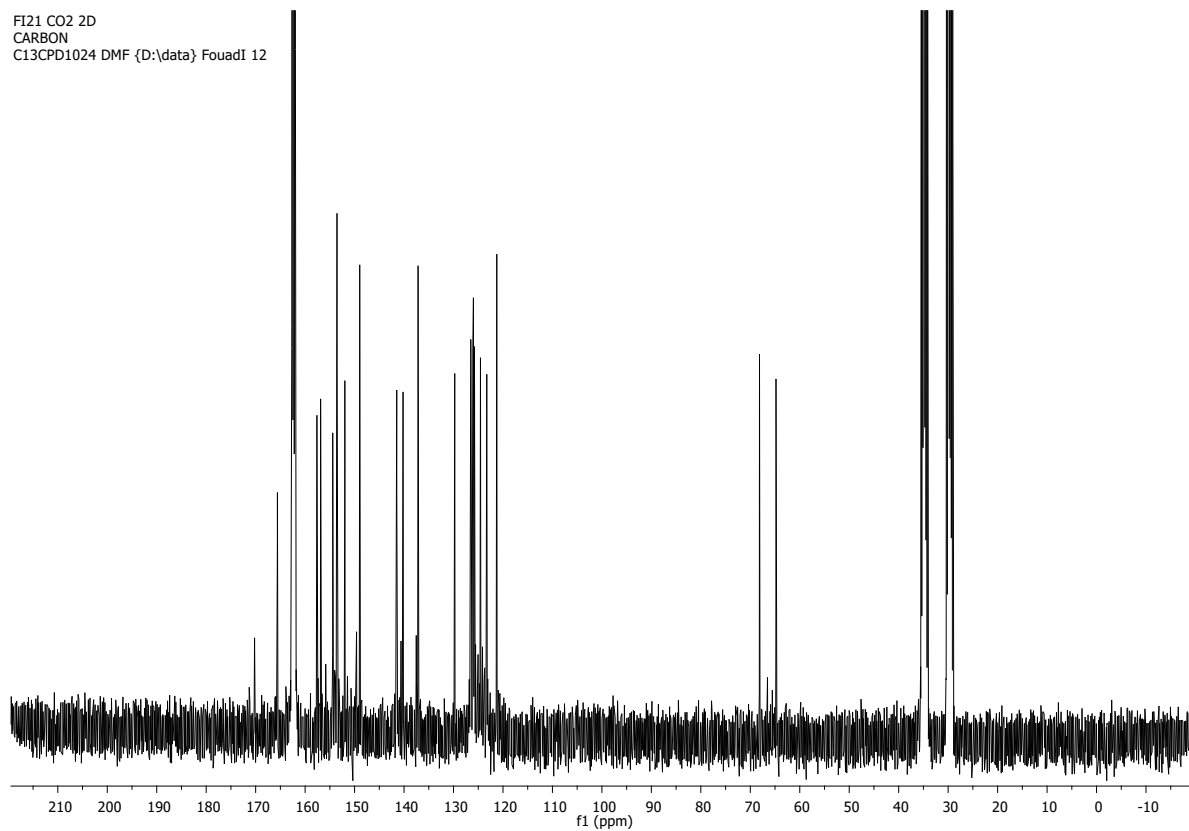

**Figure S9:** Residual density plot for [(PY4Im)Co(NCS)](ClO<sub>4</sub>)<sub>1.5</sub>(NCS)<sub>0.5</sub>·2H<sub>2</sub>O

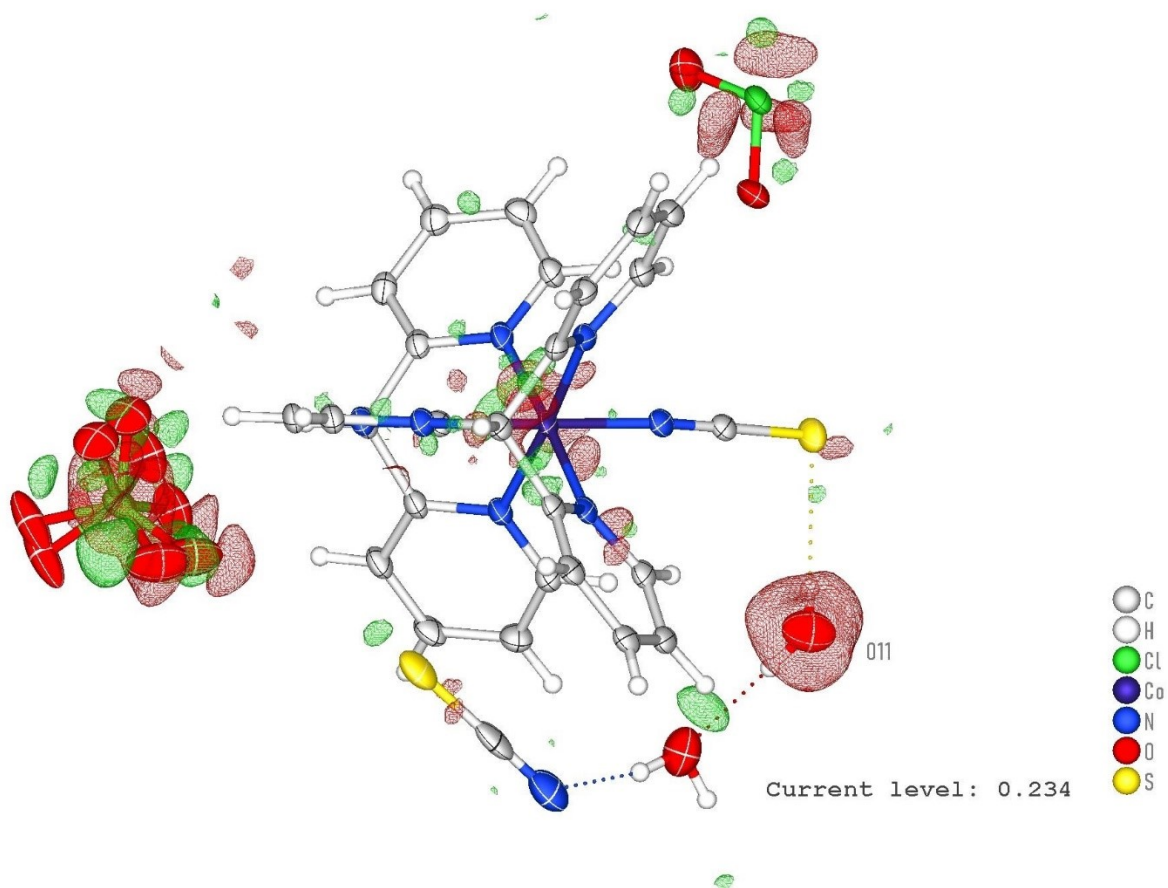

**Figure S10:** Residual density plot for [(PY4Im)Co(ONO)](ClO<sub>4</sub>)<sub>2</sub>·1.5H<sub>2</sub>O

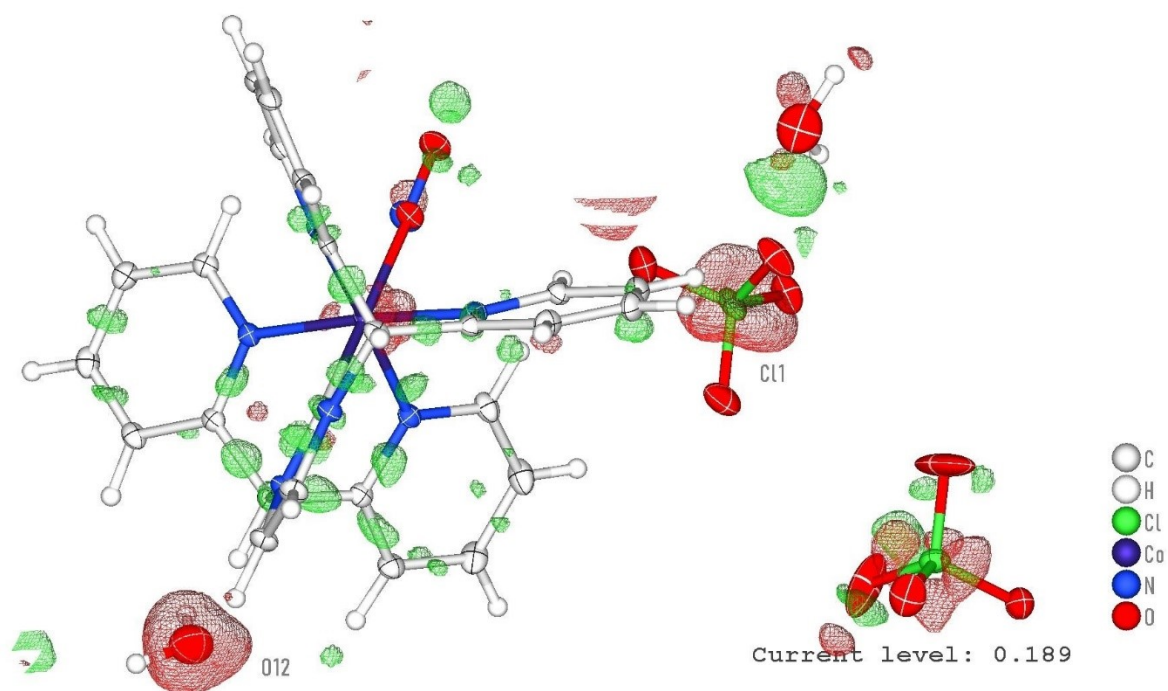

**Figure S11:** Residual density plot for *fac*-[(PY4Im- $\kappa^3N,N',C$ )Co(N<sub>3</sub>)<sub>3</sub>].(CH<sub>3</sub>)<sub>2</sub>SO

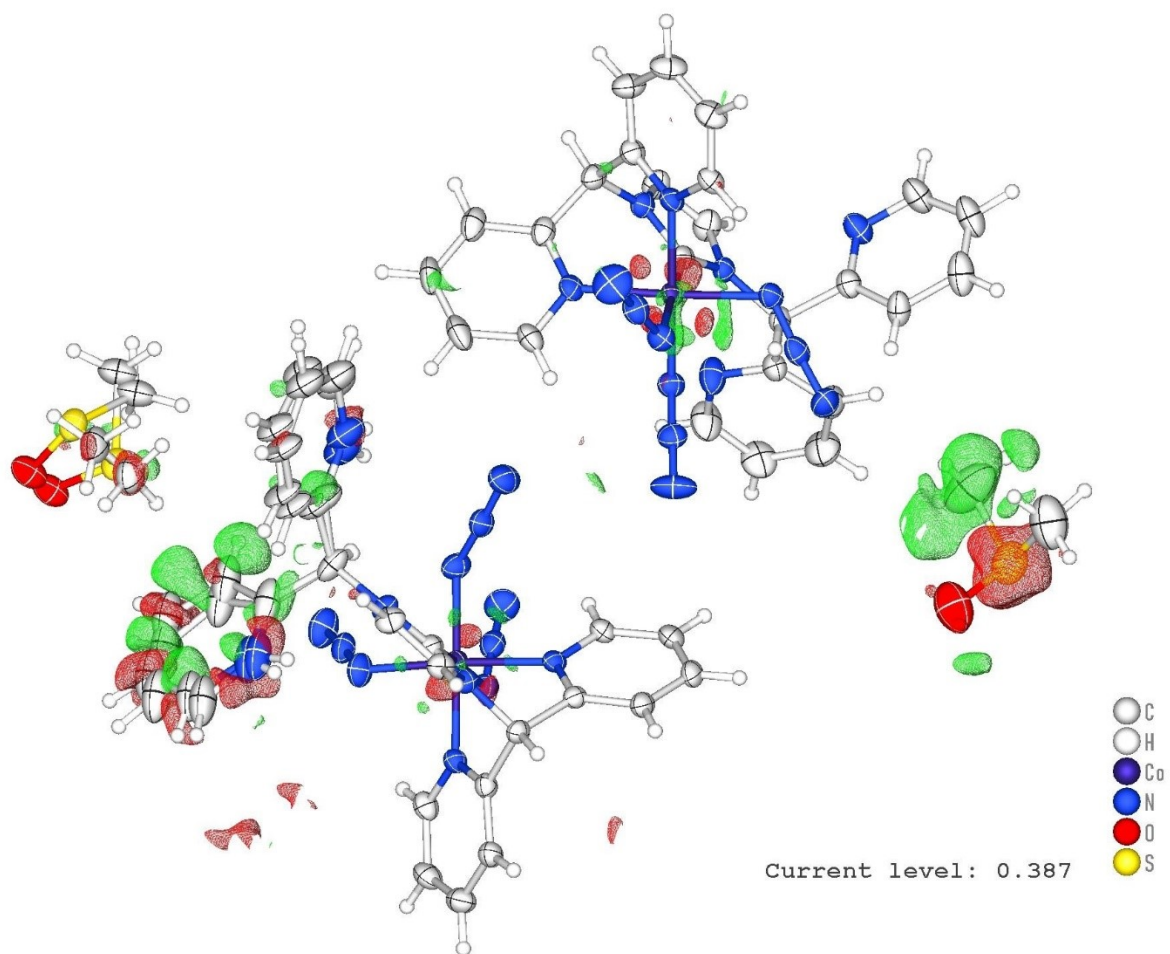

Supplement: d4dt01579g1.pdf [file d4dt01579g1.pdf]
